# Supplementary material for: Pentoxifylline for the prevention of contrast-induced nephropathy: systematic review and meta-analysis of randomised controlled trials
Source: PubMed Central journal article supplement — BMJ Open. 2021 Apr 8;11(4):e043436. doi: 10.1136/bmjopen-2020-043436 (PMC8039220; doi:10.1136/bmjopen-2020-043436), 2021-04-08
Supplement: bmjopen-2020-043436.draft_revisions.pdf [file bmjopen-2020-043436.draft_revisions.pdf]

# BMJ Open

BMJ Open is committed to open peer review. As part of this commitment we make the peer review history of every article we publish publicly available.

When an article is published we post the peer reviewers' comments and the authors' responses online. We also post the versions of the paper that were used during peer review. These are the versions that the peer review comments apply to.

The versions of the paper that follow are the versions that were submitted during the peer review process. They are not the versions of record or the final published versions. They should not be cited or distributed as the published version of this manuscript.

BMJ Open is an open access journal and the full, final, typeset and author-corrected version of record of the manuscript is available on our site with no access controls, subscription charges or pay-per-view fees (<http://bmjopen.bmj.com>).

If you have any questions on BMJ Open's open peer review process please email [info.bmjopen@bmj.com](mailto:info.bmjopen@bmj.com)

# BMJ Open

## **Pentoxifylline for the prevention of contrast-induced nephropathy: systematic review and meta-analysis of randomized controlled trials**

|                               |                                                                                                                                                                                                                                                                                                            |
|-------------------------------|------------------------------------------------------------------------------------------------------------------------------------------------------------------------------------------------------------------------------------------------------------------------------------------------------------|
| Journal:                      | <i>BMJ Open</i>                                                                                                                                                                                                                                                                                            |
| Manuscript ID                 | bmjopen-2020-043436                                                                                                                                                                                                                                                                                        |
| Article Type:                 | Original research                                                                                                                                                                                                                                                                                          |
| Date Submitted by the Author: | 04-Aug-2020                                                                                                                                                                                                                                                                                                |
| Complete List of Authors:     | Wei, Ling; Second Xiangya Hospital, Department of Nephrology<br>Zhang, Weizhi; Second Xiangya Hospital, Department of Cardiothoracic Surgery<br>Yang, Yifeng; Second Xiangya Hospital, Department of Cardiothoracic Surgery<br>Li, Dongping; Second Xiangya Hospital, Department of Cardiothoracic Surgery |
| Keywords:                     | Radiation biology < RADIOLOGY, Interventional radiology < RADIOLOGY & IMAGING, Acute renal failure < NEPHROLOGY, Coronary intervention < RADIOLOGY                                                                                                                                                         |
|                               |                                                                                                                                                                                                                                                                                                            |

SCHOLARONE™  
Manuscripts

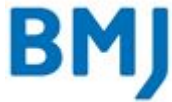

I, the Submitting Author has the right to grant and does grant on behalf of all authors of the Work (as defined in the below author licence), an exclusive licence and/or a non-exclusive licence for contributions from authors who are: i) UK Crown employees; ii) where BMJ has agreed a CC-BY licence shall apply, and/or iii) in accordance with the terms applicable for US Federal Government officers or employees acting as part of their official duties; on a worldwide, perpetual, irrevocable, royalty-free basis to BMJ Publishing Group Ltd ("BMJ") its licensees and where the relevant Journal is co-owned by BMJ to the co-owners of the Journal, to publish the Work in this journal and any other BMJ products and to exploit all rights, as set out in our [licence](#).

The Submitting Author accepts and understands that any supply made under these terms is made by BMJ to the Submitting Author unless you are acting as an employee on behalf of your employer or a postgraduate student of an affiliated institution which is paying any applicable article publishing charge ("APC") for Open Access articles. Where the Submitting Author wishes to make the Work available on an Open Access basis (and intends to pay the relevant APC), the terms of reuse of such Open Access shall be governed by a Creative Commons licence – details of these licences and which [Creative Commons](#) licence will apply to this Work are set out in our licence referred to above.

Other than as permitted in any relevant BMJ Author's Self Archiving Policies, I confirm this Work has not been accepted for publication elsewhere, is not being considered for publication elsewhere and does not duplicate material already published. I confirm all authors consent to publication of this Work and authorise the granting of this licence.

1  
2  
3  
4  
5  
6  
7  
8  
9  
10  
11

# **Pentoxifylline for the prevention of contrast-induced nephropathy: systematic review and meta-analysis of randomized controlled trials**

12  
13  
14  
15

Ling Wei<sup>1</sup>, Weizhi Zhang<sup>2</sup>, Yifeng Yang<sup>2</sup>, Dongping Li<sup>2</sup>

16  
17  
18  
19

<sup>1</sup> Department of Nephrology, The Second Xiangya Hospital, Central South University, Changsha, Hunan, China;

20  
21  
22  
23  
24  
25

<sup>2</sup> Department of Cardiothoracic Surgery, The Second Xiangya Hospital, Central South University, Changsha, Hunan, China

26  
27

Correspondence: Dongping Li

28  
29

Department of Cardiothoracic Surgery

30  
31

The Second Xiangya Hospital of Central South University

32  
33

139 Middle Renmin Road, Changsha, Hunan, 410011, China

34  
35

Tel: (+86) 731-8529-6106

36  
37

Fax: (+86) 731-8529-6606

38  
39  
40  
41  
42  
43  
44  
45  
46  
47  
48  
49  
50  
51  
52  
53  
54  
55  
56  
57  
58  
59  
60

Email: dongpingli@csu.edu.cn

**Abstract:**

**Objectives:** To summarize current evidence of pentoxifylline for the prevention of contrast-induced nephropathy

**Methods:** PubMed, Embase and CENTRAL database were searched for randomized controlled trials on patients with and without pentoxifylline undergoing contrast media exposure. We analyze the incidence of contrast-induced nephropathy and serum creatinine change before and after contrast media exposure. All statistical analyses were conducted with Review Manager v.5.3.

**Results:** We finally enrolled in seven randomized controlled trials with a total of 1484 patients in this analysis. There is no significant reduction in contrast-induced nephropathy rate observed in the patients treated with pentoxifylline compared to the control groups (OR 0.81, 95%CI 0.57, 1.13, I<sup>2</sup>=0, p=0.21). However, it is interesting to note that perioperative therapy of pentoxifylline did reduce serum creatinine change compared to the control groups (MD -0.02; 95%CI -0.03, -0.02, I<sup>2</sup>=0, p<0.00001).

**Conclusion:** Perioperative administration of pentoxifylline to patients undergoing angioplasty significantly lower serum creatinine increase but did not significantly reduce the development of contrast-induced nephropathy. Pentoxifylline might be a potential agent for renoprotection to contrast-induced nephropathy.

**Keywords:** pentoxifylline, contrast-induced nephropathy, angioplasty, serum creatinine change

## Strengths and limitations of this study

1. This is the first meta-analysis to summarize current evidence of pentoxifylline for the prevention of contrast-induced nephropathy
2. The results was reported according to PRISMA checklist and Cochrane handbook.
3. Given the small number of trials included in each analysis, we fail to assess the publication bias and small study effects with funnel plots.

## Introduction

Contrast-induced acute kidney injury, which is also known as Contrast-induced nephropathy (CIN), is defined as the development of acute kidney injury (AKI) following contrast medium exposure, without an alternative etiology <sup>1</sup>. With the wide application of cardiac catheterizations and nearly 30 million doses of contrast media injection annually <sup>2</sup>, CIN constitutes the third leading cause of hospital-acquired AKI <sup>3</sup>. CIN is associated with the in-hospital need for dialysis, long-term kidney failure and overall mortality, and consequently prolong hospital stay and increase the cost of hospitalization <sup>4</sup>. Even if serum creatinine (Scr) would recover to the baseline quickly in most CIN patients, they still suffer worse long-term outcomes than these without CIN <sup>5</sup>. In light of the vast threaten to people's health and public costs, it has become imperative to carry out work on the prevention of CIN.

Pentoxifylline (PTX) is a methyl-xanthine derivative with powerful properties of antioxidation, anti-inflammation and anti-immunity. It is generally used to treat peripheral vascular diseases. PTX improves the flexibility and oxygen delivery capacity of the red blood cell, resulting in the improvement of hemodynamics. Besides, studies in animal models showed that PTX could effectively attenuate kidney injury induced by contrast media or *Escherichia coli* <sup>6,7</sup>. In fact, several clinical trials suggested that PTX may be a potential candidate for renal protection <sup>8-10</sup>.

PTX has been investigated in randomized controlled trials (RCTs) as a potential agent to prevent CIN <sup>11-17</sup>. However, neither systematic reviews nor meta-analyses have been conducted to date to the best of our knowledge. Therefore, we perform this systematic review and meta-analysis of currently available RCTs to summarize and evaluate the renal protective capacity of PTX under contrast media stress.

## Material and methods

### *Search strategy*

We searched electronic databases (PubMed, Embase and Cochrane Central Register of Controlled Trials (Central)) for potential clinical trials up to 29 June 2020 with no language

1  
2  
3 restriction, using combinations of the main terms “contrast-induced nephropathy” and  
4  
5 “pentoxifylline”. The details of the search strategy were shown in Appendix.1. Two authors (LW  
6  
7 and DL) performed the literature search independently. We also checked relevant reviews and  
8  
9 the reference lists of the original articles for further suitable publications.

## 10 11 **Study selection**

12  
13  
14 LW and DL independently screened the titles, abstracts or full texts and assessed their  
15  
16 eligibility. We included studies that met the following criteria: RCTs enrolled population underwent  
17  
18 contrast media exposure; trials used PTX for prevention of CIN; and trials reported CIN rate  
19  
20 and/or Scr change after exposure. The exclusion criteria were: animal studies; non RCTs; lack of  
21  
22 necessary data. Any disagreements were resolved by discussion with a third author (ZW).

## 23 24 **Data extraction**

25  
26 Two independent reviewers (LW and DL) extracted data from each eligible study. Data  
27  
28 extracted from studies included study characteristics, patient characteristics, details regarding  
29  
30 PTX groups and control groups, and outcome assessments. Outcomes of interest for this study  
31  
32 were the incidence of CIN and Scr change after exposure.

## 33 34 **Risk of bias**

35  
36 The risk of bias was assessed through the Cochrane Collaboration Tool. Six domains were  
37  
38 evaluated: sequence generation for randomization, allocation concealment, blinding, incomplete  
39  
40 outcome data, selective outcome reporting, and other sources of bias. Suppose one or more  
41  
42 items rated as having a high risk of bias, or multiple items rated as “unclear risk”, studies were  
43  
44 classified as “high risk”. Studies were classified as “low risk” when all components were rated as  
45  
46 “low risk”.

## 47 48 **Outcomes**

49  
50 The primary outcome was the incidence of CIN, defined as a minimum 0.5mg/dl or 25%  
51  
52 increase in Scr 48h after contrast media exposure. The secondary outcomes were Scr change  
53  
54  
55  
56  
57  
58  
59  
60

1  
2  
3 after exposure, defined as the difference between Scr after and before the procedure; hospital  
4 mortality and the new requirement for dialysis.  
5

## 6 **Statistical analysis**

7  
8  
9 Meta-analysis was performed using Review Manager 5.3. We used  $\text{Chi}^2$  and  $I^2$  were used  
10 to verify the heterogeneity among the studies. Values of the index of under 25%, between 25%  
11 and 50%, and over 50% indicated low, moderate, and high heterogeneity, respectively. Statistical  
12 significance of heterogeneity was set at a p-value of 0.05. If no substantial heterogeneity was  
13 observed ( $p \geq 0.05$  or  $I^2 < 50\%$ ), the fixed-effect model was used. Conversely, we presented the  
14 results with the random effect model. Mean difference (MD) and Odds ratio (OR) with the 95%  
15 confidence interval (CI) were used to evaluate the continuous and binary variables, respectively.  
16 Sensitivity analysis was performed to detect the robustness and reliability of our results, by  
17 sequentially omitting every single study. We used the funnel plot to evaluate the potential  
18 publication bias.  
19  
20  
21  
22  
23  
24  
25  
26  
27  
28  
29

## 30 **Results**

### 31 **Study selection and characteristics of included studies**

32  
33  
34 Figure. 1 shown the literature searching process. We found 109 records from the  
35 database. After exclusion of duplicates and irrelevant studies, we finally enrolled seven  
36 randomized controlled trials<sup>11-17</sup> with a total of 1484 patients in this meta-analysis. Characteristics  
37 of the included trials were presented in Table. 1. All of 7 included studies were performed in  
38 patients undergoing angioplasty or stenting. Five of seven trials enrolled ordinary patients<sup>[11-15]</sup>;  
39 one study enrolled diabetic patients<sup>16</sup>, and the remaining one enrolled high-risk patients<sup>17</sup>. There  
40 were 740 patients in the PTX groups and 744 in the control groups.  
41  
42  
43  
44  
45  
46  
47  
48

### 49 **Primary outcome**

50  
51  
52 Data on the incidence of CIN were available in all studies included in this meta-analysis.  
53  
54 The overall rate of CIN were 8.8% and 10.4% in the PTX groups and control groups, respectively.  
55  
56 However, there is no significant reduction in CIN rate was observed in the patients treated with  
57  
58  
59  
60



1  
2  
3 PTX compared to the control groups (OR 0.81, 95%CI 0.57, 1.13, I2=0, p=0.21) (Figure. 2).

4  
5 Similarly, incidences of CIN were also comparable between groups in the ordinary patients  
6  
7 subgroups (OR 0.79, 95%CI 0.56, 1.12, I2=8%, p=0.19) (Figure. 3).

## 8 9 **Secondary outcome**

10  
11 Data on Scr change after exposure were available in four of seven trials<sup>13, 15-17</sup> included in  
12  
13 this meta-analysis. Figure. 4 presented that the PTX groups had lower Scr increase after contrast  
14  
15 media exposure compared to the control groups (MD -0.02; 95%CI -0.03,-0.02, I2=0, p<0.00001).  
16  
17 All studies reported that no hospital mortality and the new requirement for dialysis during the  
18  
19 trials.

## 20 21 **Risk of bias assessment and sensitivity analysis**

22  
23 The risk of bias is presented in Figure.2. The randomization procedure was not described  
24  
25 in three studies<sup>11, 14, 15</sup>. Six studies did not use the placebo as control and were thus not blinded  
26  
27 <sup>11-16</sup>. However, as the development of CIN and Scr change are objectively defined, and hence  
28  
29 less likely to bias. Outcome assessors in all trials were blinded to the trial protocol. All trials were  
30  
31 free of selective outcome reporting.

32  
33 Given the limited number of studies included in this meta-analysis, the funnel plot is not  
34  
35 applicable for evaluating the publication bias and small-study effects.

36  
37 Sensitivity analysis was performed by sequentially omitting every single study. CIN rate  
38  
39 remained comparable between groups after excluded each trial, indicating that our result was  
40  
41 reliable and not skewed by a single dominant study.

## 42 43 44 **Discussion**

45  
46  
47 This is the first systematic review and meta-analysis to summarized current evidence of  
48  
49 PTX for the prevention of CIN. The results suggested that perioperative administration of PTX to  
50  
51 patients undergoing angioplasty or PCI significantly lower Scr increase but did not significantly  
52  
53 reduce the development of AKI.

1  
2  
3 Our primary outcome was the incidence of CIN. There was no significant impact of PTX on  
4 this predefined primary outcome. A reasonable explanation was that although we pooled 7  
5 studies with a total of 1484 patients in this meta-analysis, the number of CIN rates was limited.  
6  
7 Therefore, the CIs for CIN prevention effect of PTX treatment are wide and so its renoprotective  
8 effects may be underestimated in the included trials. Consequently, more trials with larger sample  
9 sizes are needed to evaluate the role of PTX in CIN prevention.  
10  
11  
12  
13

14 However, it is interesting to note that perioperative therapy of PTX did reduce Scr change.  
15 In a database analysis, Weisbord and colleagues reported that even a small increase of the post-  
16 operation Scr had been associated with adverse outcomes in the coronary arteriography  
17 population<sup>18</sup>. Losito and colleagues also showed that the increase of Scr below the AKI threshold  
18 is still closely correlated with increased long-term mortality<sup>19</sup>. Therefore, PTX's impact on Scr  
19 may raise growing interest in future studies as a potential agent for renoprotection to CIN.  
20 Besides, compared with de novo drug development for CIN prevention, repurposing PTX  
21 obviously saves money and time, and it can be speedily applied in clinical practice.  
22  
23  
24  
25  
26  
27  
28  
29

30 CIN is a kind of AKI with complex and poorly understood mechanisms. Several studies  
31 have found that contrast media would lead to renal vascular contraction and subsequently  
32 decrease of peripheral medullary blood flow, resulting in renal tubular anoxia and oxidative stress  
33 injury<sup>20-22</sup>. Besides, a higher concentration of contrast agent in the renal tubular leads to viscosity  
34 increase and result in tubule blocked<sup>23</sup>. PTX is a methyl-xanthine derivative with multiple  
35 biochemical properties and is commonly used to treat peripheral vascular disease caused by  
36 peripheral vascular disease<sup>24</sup>. PTX is a non-selective inhibition of phosphodiesterases, which  
37 can increase the intracellular levels of cAMP, leading to an improvement of oxygen delivery and a  
38 decrease of oxygen free radicals production [25]. This property, together with its capability of  
39 reducing blood viscosity and therefore increasing intraglomerular pressure<sup>26</sup>, supporting the  
40 speculation on underlying renoprotective effects of PTX.  
41  
42  
43  
44  
45  
46  
47  
48  
49  
50

51 The present study had several limitations. First, most studies use Scr to evaluate the renal  
52 function, and only 3 trials reported Scr changes before and after contrast media exposure. Future  
53 studies should use more sensitive markers to assess the renal function, allowing a  
54  
55  
56  
57  
58  
59  
60

1  
2  
3 comprehensive evaluation of the renal condition. Second, given the small number of trials  
4 included in each analysis, we fail to assess the publication bias and small study effects with  
5 funnel plots. Third, it would have been interesting to know if PTX treatment in subgroups such as  
6 the elderly and women would also be favorable compared to control. However, we failed to make  
7 a subgroup analysis because of lacking data.  
8  
9  
10  
11  
12

## 13 **Conclusion**

14 Perioperative administration of PTX to patients undergoing PCI or angioplasty significantly lower  
15 Scr increase but did not significantly reduce the development of CIN. PTX might be a potential  
16 agent for renoprotection to CIN.  
17  
18  
19  
20  
21  
22  
23

## 24 **Acknowledgments**

25 None  
26  
27  
28  
29

## 30 **Disclosure**

31 The author reports no conflicts of interest in this work.  
32  
33  
34  
35

## 36 **Funding**

37 This study was supported by the National Natural Science Foundation of China  
38 (2017YFC1308102)  
39  
40  
41  
42  
43

## 44 **Patient and public involvement**

45 Since this is a meta-analysis, no patient and public involved in the design and the implementation  
46 of this study.  
47  
48  
49  
50  
51  
52  
53  
54  
55  
56  
57  
58  
59  
60

## Author's Contributions

(I) Conception and design: D.L (II) Administrative support: Y.Y and W.Z (III) Provision of study materials or patients: L.W and D.L (IV) Collection and assembly of data: L.W and D.L (V) Data analysis and interpretation: L.W and D.L (VI) Manuscript writing: All authors (VII) Final approval of manuscript: All authors

**Word count:** 3155

## References

1. Azzalini L, Spagnoli V, Ly HQ. Contrast-Induced Nephropathy: From Pathophysiology to Preventive Strategies. *Can J Cardiol.* 2016;32(2):247-255.
2. Solomon R. Contrast media: are there differences in nephrotoxicity among contrast media? *Biomed Res Int.* 2014;2014:934947.
3. Nash K, Hafeez A, Hou S. Hospital-acquired renal insufficiency. *Am J Kidney Dis.* 2002;39(5):930-936.
4. Abe M, Morimoto T, Akao M, et al. Relation of contrast-induced nephropathy to long-term mortality after percutaneous coronary intervention. *Am J Cardiol.* 2014;114(3):362-368.
5. Wi J, Ko YG, Kim JS, et al. Impact of contrast-induced acute kidney injury with transient or persistent renal dysfunction on long-term outcomes of patients with acute myocardial infarction undergoing percutaneous coronary intervention. *Heart.* 2011;97(21):1753-1757.
6. Yang SK, Duan SB, Pan P, Xu XQ, Liu N, Xu J. Preventive effect of pentoxifylline on contrast-induced acute kidney injury in hypercholesterolemic rats. *Exp Ther Med.* 2015;9(2):384-388.
7. Groesdonk HV, Bauer A, Kreft B, Heringlake M, Paarmann H, Pagel H. Urodilatin and pentoxifylline prevent the early onset of Escherichia coli-induced acute renal failure in a model of isolated perfused rat kidney. *Kidney Blood Press Res.* 2009;32(2):81-90.

- 1  
2  
3 **8.** Perkins RM, Aboudara MC, Uy AL, Olson SW, Cushner HM, Yuan CM. Effect of  
4 pentoxifylline on GFR decline in CKD: a pilot, double-blind, randomized, placebo-controlled trial.  
5 *Am J Kidney Dis.* 2009;53(4):606-616.  
6
- 7  
8 **9.** Navarro-González JF, Mora-Fernández C, Muros DFM, et al. Effect of pentoxifylline on  
9 renal function and urinary albumin excretion in patients with diabetic kidney disease: the  
10 PREDIAN trial. *J Am Soc Nephrol.* 2015;26(1):220-229.  
11
- 12  
13 **10.** Chen PM, Lai TS, Chen PY, et al. Renoprotective effect of combining pentoxifylline with  
14 angiotensin-converting enzyme inhibitor or angiotensin II receptor blocker in advanced chronic  
15 kidney disease. *J Formos Med Assoc.* 2014;113(4):219-226.  
16
- 17  
18 **11.** Firouzi A, Eshraghi A, Shakerian F, et al. Efficacy of pentoxifylline in prevention of  
19 contrast-induced nephropathy in angioplasty patients. *Int Urol Nephrol.* 2012;44(4):1145-1149.  
20
- 21  
22 **12.** Shakeryan F, Sanati H, Fathi H, et al. Evaluation of combination therapy with vitamin C  
23 and pentoxifylline on preventing kidney failure secondary to intravenous contrast material in  
24 coronary angioplasty. *Iranian Heart Journal.* 2013;14(3):17-21.  
25
- 26  
27 **13.** Yavari V, Ostovan MA, Kojuri J, et al. The preventive effect of pentoxifylline on contrast-  
28 induced nephropathy: A randomized clinical trial. *Int Urol Nephrol.* 2014;46(1):41-46.  
29
- 30  
31 **14.** Firouzi A, Shahsavari H, Kiani R, Aeinfar K, Shamloo Y, Mortezaian H. Evaluation of  
32 pentoxifylline in the prevention of contrast-induced nephropathy in patients undergoing primary  
33 percutaneous coronary intervention. *Iranian Heart Journal.* 2015;16(4):28-34.  
34
- 35  
36 **15.** Eshraghi A, Naranji-Sani R, Pourzand H, et al. Pentoxifylline and prevention of contrast-  
37 induced nephropathy: Is it efficient in patients with myocardial infarction undergoing coronary  
38 angioplasty? *ARYA Atherosclerosis.* 2016;12(5):1-5.  
39
- 40  
41 **16.** Aslanabadi N, Afsar GR, Moharramzadeh S, Entezari-Maleki T. Pentoxifylline for the  
42 prevention of contrast-induced nephropathy in diabetic patients undergoing angioplasty: a  
43 randomized controlled trial. *Int Urol Nephrol.* 2019;51(4):699-705.  
44
- 45  
46 **17.** Barzi F, Miri R, Sadeghi R, et al. A randomized double blind placebo controlled trial  
47 examining the effects of pentoxifylline on contrast induced nephropathy reduction after  
48  
49  
50  
51  
52  
53  
54  
55  
56  
57  
58  
59  
60

1  
2  
3 percutaneous coronary intervention in high risk candidates. *Iran J Pharm Res.* 2019;18(2):1040-  
4 1046.

5  
6  
7 **18.** Weisbord SD, Chen H, Stone RA, et al. Associations of increases in serum creatinine  
8 with mortality and length of hospital stay after coronary angiography. *J Am Soc Nephrol.*  
9 2006;17(10):2871-2877.

10  
11  
12 **19.** Losito A, Nunzi E, Pittavini L, Zampi I, Zampi E. Cardiovascular morbidity and long term  
13 mortality associated with in hospital small increases of serum creatinine. *J Nephrol.*  
14 2018;31(1):71-77.

15  
16  
17 **20.** Mccullough PA, Stacul F, Davidson C, Becker CR, Tumlin J. Contrast-induced  
18 nephropathy: Clinical insights and practical guidance - A report from the CIN Consensus Working  
19 Panel - Overview. *American Journal of Cardiology* 98(6A, Suppl. S): 2K-4K. 2006;98(6A):2K-4K.

20  
21  
22 **21.** Moreau JF, Droz D, Noel LH, Leibowitch J, Jungers P, Michel JR. Tubular nephrotoxicity  
23 of water-soluble iodinated contrast media. *Invest Radiol.* 1980;15(6 Suppl):S54-S60.

24  
25  
26 **22.** Sendeski M, Patzak A, Pallone TL, Cao C, Persson AE, Persson PB. Iodixanol,  
27 constriction of medullary descending vasa recta, and risk for contrast medium-induced  
28 nephropathy. *Radiology.* 2009;251(3):697-704.

29  
30  
31 **23.** Seeliger E, Lenhard DC, Persson PB. Contrast media viscosity versus osmolality in  
32 kidney injury: lessons from animal studies. *Biomed Res Int.* 2014;2014:358136.

33  
34  
35 **24.** De Sanctis MT, Cesarone MR, Belcaro G, et al. Treatment of intermittent claudication  
36 with pentoxifylline: a 12-month, randomized trial--walking distance and microcirculation.  
37 *Angiology.* 2002;53 Suppl 1:S7-S12.

38  
39  
40 **25.** Lugnier C. Cyclic nucleotide phosphodiesterase (PDE) superfamily: a new target for the  
41 development of specific therapeutic agents. *Pharmacol Ther.* 2006;109(3):366-398.

42  
43  
44 **26.** Dettelbach HR, Aviado DM. Clinical pharmacology of pentoxifylline with special reference  
45 to its hemorrheologic effect for the treatment of intermittent claudication. *J Clin Pharmacol.*  
46 1985;25(1):8-26.

**Table 1** Baseline characteristics of included studies.

| Study ID        | PTX dosage regimen                                                | Contrast media          | CIN definition                                              | Number |         | Outcomes           | CIN number |         |
|-----------------|-------------------------------------------------------------------|-------------------------|-------------------------------------------------------------|--------|---------|--------------------|------------|---------|
|                 |                                                                   |                         |                                                             | PTX    | Control |                    | PTX        | Control |
| Firouzi 2012    | 400mg/Tid from 24h before to 24h after procedure                  | Ultravist/<br>Visipaque | Minimum 0.5mg/dl or 25% increase in Scr 48h after procedure | 140    | 146     | CIN rate           | 12         | 20      |
| Shakeryan 2013  | 400mg/Tid from 24h before to 24h after procedure                  | Visipaque               | Minimum 0.5mg/dl or 25% increase in Scr 48h after procedure | 164    | 164     | CIN rate           | 14         | 23      |
| Yavari 2014     | 400mg/Tid from 24h before to 24h after procedure                  | Visipaque               | Minimum 25% increase in Scr 48h after procedure             | 97     | 102     | CIN rate/<br>Δ Scr | 6          | 6       |
| Firouzi 2015    | 400mg/Tid from the initiation of the study to 24h after procedure | Ultravist/<br>Visipaque | Minimum 0.5mg/dl or 25% increase in Scr 48h after procedure | 148    | 148     | CIN rate           | 18         | 22      |
| Eshraghi 2016   | 400mg/Tid from the initiation of the study to 24h after procedure | Visipaque               | Minimum 0.5mg/dl or 25% increase in Scr 48h after procedure | 91     | 84      | CIN rate/<br>Δ Scr | 6          | 8       |
| Aslanabadi 2019 | 1200mg /once 2-4h before procedure                                | Visipaque               | Minimum 0.5mg/dl or 25% increase in Scr 24h after procedure | 45     | 45      | CIN rate/<br>Δ Scr | 4          | 3       |
| Barzi 2019      | 400mg/Tid from 24h before to 48h after procedure                  | Visipaque 320           | Minimum 0.5mg/dl increase in Scr 24h after procedure        | 55     | 55      | CIN rate/<br>Δ Scr | 2          | 2       |

**Notes:** Tid, Three Times a Day; Δ Scr, serum creatinine change before and after contrast media exposure

**Abbreviations:** CIN, contrast-induced nephropathy; Scr, serum creatinine

1  
2  
3 **Figure legends**  
4

5 **Figure 1** Flow chart of the literature searching process.  
6  
7

8  
9 **Figure. 2** Evaluation of the incidence of contrast-induced nephropathy between the  
10 pentoxifylline group and the control.  
11  
12

13  
14 **Figure. 3** Evaluation of the incidence of contrast-induced nephropathy in the ordinary  
15 patient subgroups between the pentoxifylline group and the control.  
16  
17

18  
19  
20 **Figure. 4** Evaluation of the serum creatinine change before and after contrast media  
21 exposure between the pentoxifylline group and the control.  
22  
23  
24  
25  
26  
27  
28  
29  
30  
31  
32  
33  
34  
35  
36  
37  
38  
39  
40  
41  
42  
43  
44  
45  
46  
47  
48  
49  
50  
51  
52  
53  
54  
55  
56  
57  
58  
59  
60



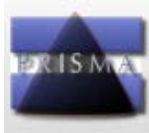

## PRISMA 2009 Flow Diagram

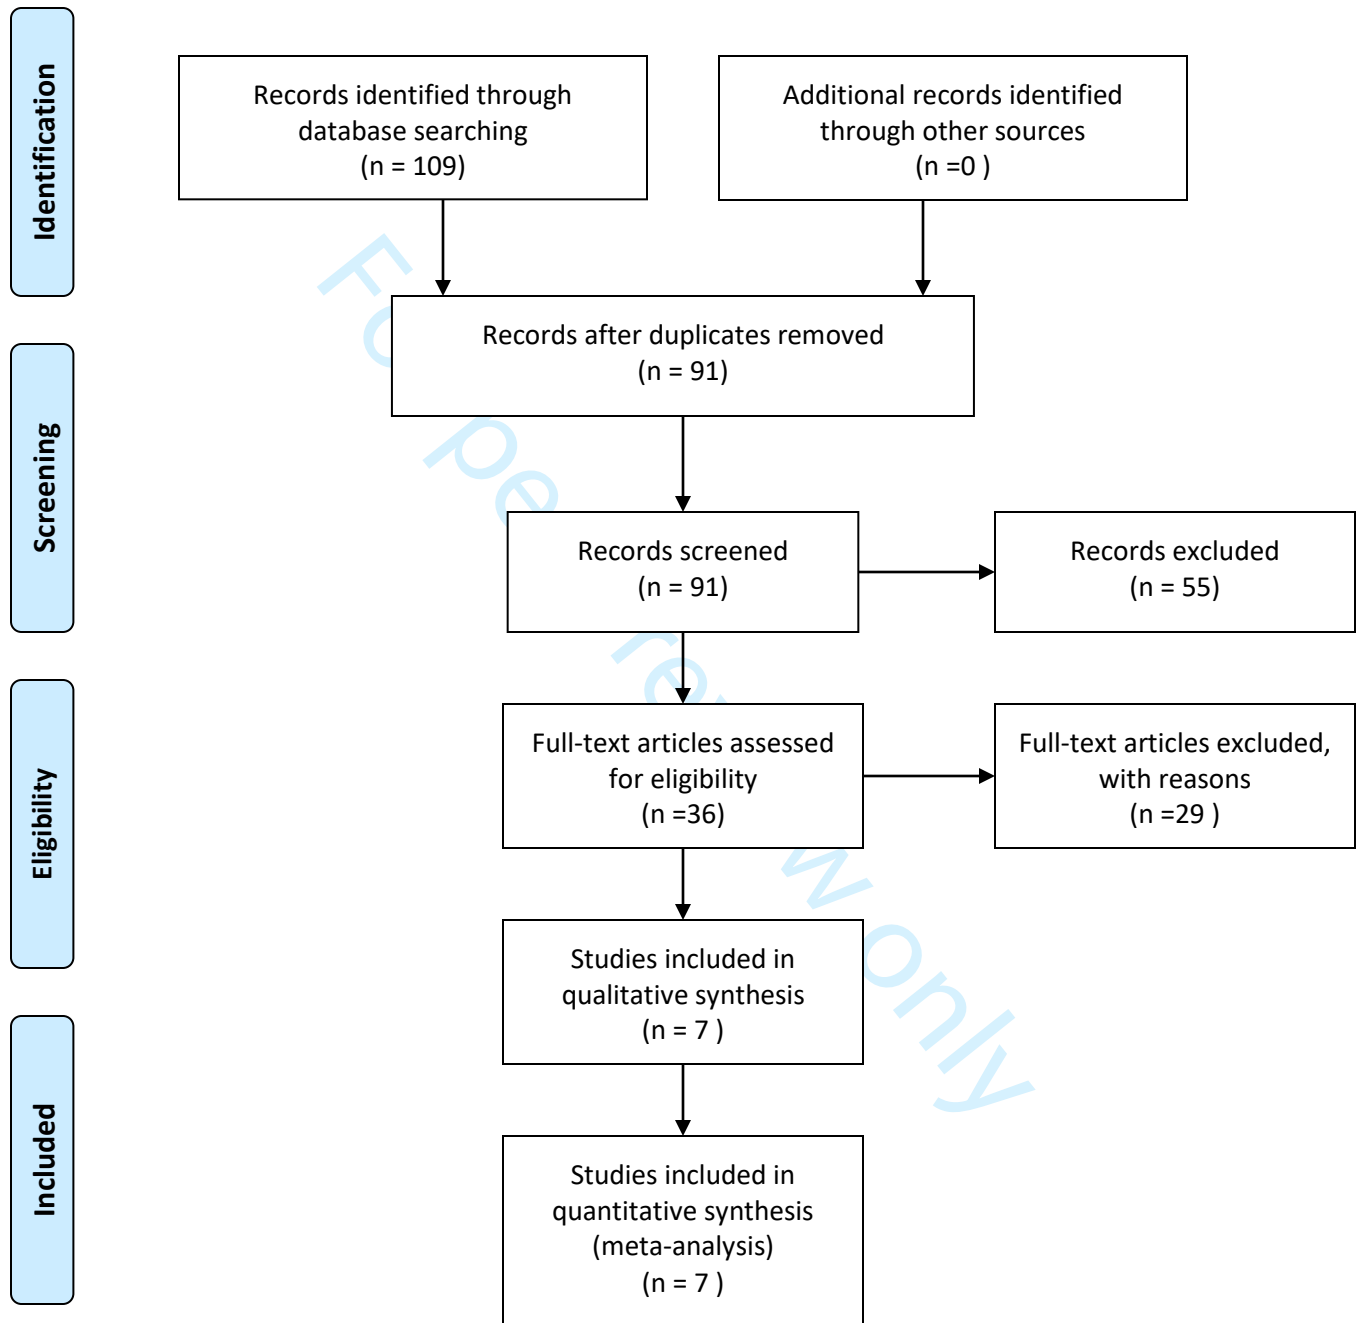

From: Moher D, Liberati A, Tetzlaff J, Altman DG, The PRISMA Group (2009). Preferred Reporting Items for Systematic Reviews and Meta-Analyses: The PRISMA Statement. PLoS Med 6(7): e1000097. doi:10.1371/journal.pmed1000097

For more information, visit [www.prisma-statement.org](http://www.prisma-statement.org).

For peer review only - <http://bmjopen.bmj.com/site/about/guidelines.xhtml>

1  
2  
3  
4  
5  
6  
7  
8  
9  
10  
11  
12  
13  
14  
15  
16  
17  
18  
19  
20  
21  
22  
23  
24  
25  
26  
27  
28  
29  
30  
31  
32  
33  
34  
35  
36  
37  
38  
39  
40  
41  
42  
43  
44  
45  
46  
47  
48  
49  
50  
51  
52  
53  
54  
55  
56  
57  
58  
59  
60

FOR

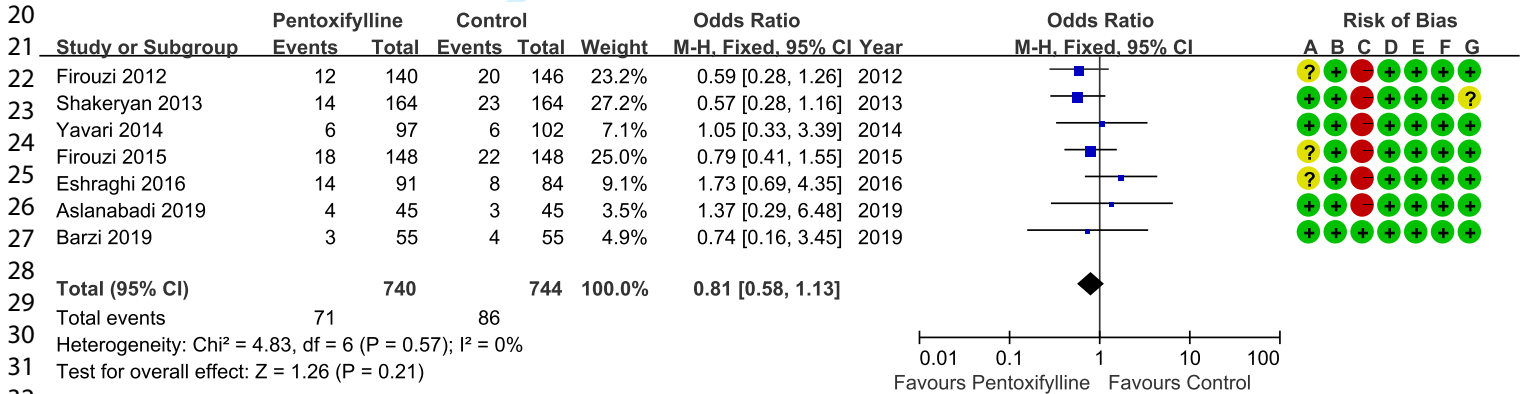

Risk of bias legend

- (A) Random sequence generation (selection bias)
- (B) Allocation concealment (selection bias)
- (C) Blinding of participants and personnel (performance bias)
- (D) Blinding of outcome assessment (detection bias)
- (E) Incomplete outcome data (attrition bias)
- (F) Selective reporting (reporting bias)
- (G) Other bias

FOR

1  
2  
3  
4  
5  
6  
7  
8  
9  
10  
11  
12  
13  
14  
15  
16  
17  
18  
19  
20  
21  
22  
23  
24  
25  
26  
27  
28  
29  
30  
31  
32  
33  
34  
35  
36  
37  
38  
39  
40  
41  
42  
43  
44  
45  
46  
47  
48  
49  
50  
51  
52  
53  
54  
55  
56  
57  
58  
59  
60

For peer review only

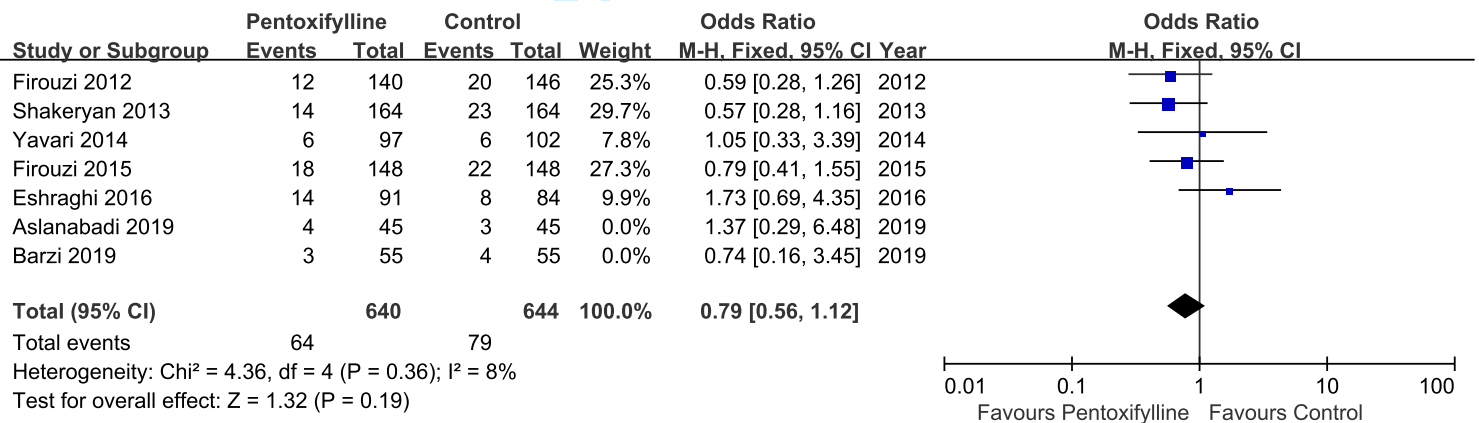

Only

1  
2  
3  
4  
5  
6  
7  
8  
9  
10  
11  
12  
13  
14  
15  
16  
17  
18  
19  
20  
21  
22  
23  
24  
25  
26  
27  
28  
29  
30  
31  
32  
33  
34  
35  
36  
37  
38  
39  
40  
41  
42  
43  
44  
45  
46  
47  
48  
49  
50  
51  
52  
53  
54  
55  
56  
57  
58  
59  
60

For peer

| Study or Subgroup     | Pentoxifylline |       |            | Control |      |            | Weight        | Mean Difference   |                       | Year |
|-----------------------|----------------|-------|------------|---------|------|------------|---------------|-------------------|-----------------------|------|
|                       | Mean           | SD    | Total      | Mean    | SD   | Total      |               | IV, Fixed, 95% CI | 95% CI                |      |
| Yavari 2014           | 0.23           | 0.14  | 97         | 0.24    | 0.14 | 102        | 1.5%          | -0.01             | [-0.05, 0.03]         | 2014 |
| Eshraghi 2016         | 0.066          | 0.011 | 91         | 0.09    | 0.02 | 84         | 97.6%         | -0.02             | [-0.03, -0.02]        | 2016 |
| Aslanabadi 2019       | 0.11           | 0.14  | 40         | 0.15    | 0.11 | 36         | 0.7%          | -0.04             | [-0.10, 0.02]         | 2019 |
| Barzi 2019            | 0.03           | 0.35  | 55         | -0.006  | 0.24 | 55         | 0.2%          | 0.04              | [-0.08, 0.15]         | 2019 |
| <b>Total (95% CI)</b> |                |       | <b>283</b> |         |      | <b>277</b> | <b>100.0%</b> | <b>-0.02</b>      | <b>[-0.03, -0.02]</b> |      |

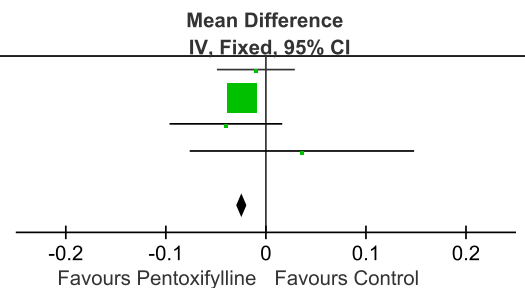

Heterogeneity: Chi<sup>2</sup> = 1.90, df = 3 (P = 0.59); I<sup>2</sup> = 0%  
 Test for overall effect: Z = 9.76 (P < 0.00001)

only

## Pubmed

((contrast induced nephropathy[MeSH Terms]) OR (((("contrast media"[MeSH Terms]) OR ("contrast media"[Title/Abstract])) OR ("contrast medium"[Title/Abstract])) OR ("contrast material"[Title/Abstract])) AND (((((((((acute kidney failure[MeSH Terms]) OR (kidney diseases[MeSH Terms])) OR ("kidney diseases")) OR ("nephropathy")) OR ("acute kidney injury")) OR ("kidney disease")) OR ("acute kidney injury")) OR ("acute renal injury")) OR ("renal disease")) OR ("renal diseases")))) AND (((("pentoxifylline"[MeSH Terms]) OR ("pentoxifylline"[Title/Abstract])) OR ("oxpentifylline"[Title/Abstract])) OR ("trental"[Title/Abstract])) OR ("Torental"[Title/Abstract])) OR ("BL - 191"[Title/Abstract]))

## Embase

### Session Results

| No.  | Query Results                                                                                                                                      | Results   | Date        |
|------|----------------------------------------------------------------------------------------------------------------------------------------------------|-----------|-------------|
| #12. | #3 AND #11                                                                                                                                         | 82        | 29 Jun 2020 |
| #11. | #4 OR #10                                                                                                                                          | 20,804    | 29 Jun 2020 |
| #10. | #8 AND #9                                                                                                                                          | 18,782    | 29 Jun 2020 |
| #9.  | #5 OR #6 OR #7                                                                                                                                     | 1,032,150 | 29 Jun 2020 |
| #8.  | 'contrast medium'/exp OR 'contrast agent':ti,ab,kw OR 'contrast media':ti,ab,kw OR 'contrast material':ti,ab,kw OR 'contrast medium':ti,ab,kw      | 195,954   | 29 Jun 2020 |
| #7.  | 'kidney disease':ti,ab,kw OR 'nephropathy':ti,ab,kw OR 'acute kidney injury':ti,ab,kw OR 'renal disease':ti,ab,kw OR 'acute renal injury':ti,ab,kw | 269,746   | 29 Jun 2020 |
| #6.  | 'acute kidney failure'/exp                                                                                                                         | 88,480    | 29 Jun 2020 |
| #5.  | 'kidney disease'/exp                                                                                                                               | 1,004,086 | 29 Jun 2020 |
| #4.  | 'contrast induced nephropathy'/exp                                                                                                                 | 4,953     | 29 Jun 2020 |
| #3.  | #1 OR #2                                                                                                                                           | 14,012    | 29 Jun 2020 |
| #2.  | 'pentoxifylline':ti,ab,kw OR 'oxpentifylline':ti,ab,kw OR 'trental':ti,ab,kw OR 'torental':ti,ab,kw OR 'bl - 191':ti,ab,kw                         | 5,902     | 29 Jun 2020 |
| #1.  | 'pentoxifylline'/exp                                                                                                                               | 13,629    | 29 Jun 2020 |

## Central

#1 MeSH descriptor: [Kidney Diseases] explode all trees 15824  
 #2 ("kidney disease"):ti,ab,kw OR ("nephropathy"):ti,ab,kw OR ("acute kidney injury"):ti,ab,kw OR ("renal disease"):ti,ab,kw OR ("acute renal injury"):ti,ab,kw (Word variations have been searched)24798

1  
2  
3 #3 MeSH descriptor: [Contrast Media] explode all trees 2673  
4 #4 ("contrast agent"):ti,ab,kw OR ("contrast media"):ti,ab,kw OR ("contrast material"):ti,ab,kw  
5 OR ("contrast-medium"):ti,ab,kw (Word variations have been searched) 5166  
6  
7 #5 #1 OR #2 31673  
8 #6 #3 or #4 5166  
9  
10 #7 #5 AND #6 992  
11 #8 MeSH descriptor: [Pentoxifylline] explode all trees 574  
12 #9 ("pentoxifylline"):ti,ab,kw OR ("oxpentifylline"):ti,ab,kw OR ("trental"):ti,ab,kw OR  
13 ("Torental"):ti,ab,kw OR ("PTF"):ti,ab,kw (Word variations have been searched) 1380  
14 #10 ("PTXF"):ti,ab,kw OR ("agapurin"):ti,ab,kw OR ("BL - 191"):ti,ab,kw (Word variations have  
15 been searched) 10  
16 #11 #8 OR #9 OR #10 1381  
17 #12 #7 AND #11 14  
18  
19  
20  
21  
22  
23  
24  
25  
26  
27  
28  
29  
30  
31  
32  
33  
34  
35  
36  
37  
38  
39  
40  
41  
42  
43  
44  
45  
46  
47  
48  
49  
50  
51  
52  
53  
54  
55  
56  
57  
58  
59  
60

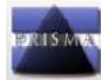

# PRISMA 2009 Checklist

1  
2  
3  
4  
5  
6  
7  
8  
9  
10  
11  
12  
13  
14  
15  
16  
17  
18  
19  
20  
21  
22  
23  
24  
25  
26  
27  
28  
29  
30  
31  
32  
33  
34  
35  
36  
37  
38  
39  
40  
41  
42  
43  
44  
45  
46  
47

| Section/topic                      | #  | Checklist item                                                                                                                                                                                                                                                                                              | Reported on page # |
|------------------------------------|----|-------------------------------------------------------------------------------------------------------------------------------------------------------------------------------------------------------------------------------------------------------------------------------------------------------------|--------------------|
| <b>TITLE</b>                       |    |                                                                                                                                                                                                                                                                                                             |                    |
| Title                              | 1  | Identify the report as a systematic review, meta-analysis, or both.                                                                                                                                                                                                                                         | 1                  |
| <b>ABSTRACT</b>                    |    |                                                                                                                                                                                                                                                                                                             |                    |
| Structured summary                 | 2  | Provide a structured summary including, as applicable: background; objectives; data sources; study eligibility criteria, participants, and interventions; study appraisal and synthesis methods; results; limitations; conclusions and implications of key findings; systematic review registration number. | 2                  |
| <b>INTRODUCTION</b>                |    |                                                                                                                                                                                                                                                                                                             |                    |
| Rationale                          | 3  | Describe the rationale for the review in the context of what is already known.                                                                                                                                                                                                                              | 3                  |
| Objectives                         | 4  | Provide an explicit statement of questions being addressed with reference to participants, interventions, comparisons, outcomes, and study design (PICOS).                                                                                                                                                  | 3                  |
| <b>METHODS</b>                     |    |                                                                                                                                                                                                                                                                                                             |                    |
| Protocol and registration          | 5  | Indicate if a review protocol exists, if and where it can be accessed (e.g., Web address), and, if available, provide registration information including registration number.                                                                                                                               | N                  |
| Eligibility criteria               | 6  | Specify study characteristics (e.g., PICOS, length of follow-up) and report characteristics (e.g., years considered, language, publication status) used as criteria for eligibility, giving rationale.                                                                                                      | 3-4                |
| Information sources                | 7  | Describe all information sources (e.g., databases with dates of coverage, contact with study authors to identify additional studies) in the search and date last searched.                                                                                                                                  | 3-4                |
| Search                             | 8  | Present full electronic search strategy for at least one database, including any limits used, such that it could be repeated.                                                                                                                                                                               | 3-4                |
| Study selection                    | 9  | State the process for selecting studies (i.e., screening, eligibility, included in systematic review, and, if applicable, included in the meta-analysis).                                                                                                                                                   | 4                  |
| Data collection process            | 10 | Describe method of data extraction from reports (e.g., piloted forms, independently, in duplicate) and any processes for obtaining and confirming data from investigators.                                                                                                                                  | 4                  |
| Data items                         | 11 | List and define all variables for which data were sought (e.g., PICOS, funding sources) and any assumptions and simplifications made.                                                                                                                                                                       | 4                  |
| Risk of bias in individual studies | 12 | Describe methods used for assessing risk of bias of individual studies (including specification of whether this was done at the study or outcome level), and how this information is to be used in any data synthesis.                                                                                      | 4                  |
| Summary measures                   | 13 | State the principal summary measures (e.g., risk ratio, difference in means).                                                                                                                                                                                                                               | 5                  |
| Synthesis of results               | 14 | Describe the methods of handling data and combining results of studies, if done, including measures of consistency (e.g., I <sup>2</sup> ) for each meta-analysis.                                                                                                                                          | 5                  |

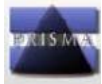

# PRISMA 2009 Checklist

Page 1 of 2

| Section/topic                 | #  | Checklist item                                                                                                                                                                                           | Reported on page # |
|-------------------------------|----|----------------------------------------------------------------------------------------------------------------------------------------------------------------------------------------------------------|--------------------|
| Risk of bias across studies   | 15 | Specify any assessment of risk of bias that may affect the cumulative evidence (e.g., publication bias, selective reporting within studies).                                                             | 4                  |
| Additional analyses           | 16 | Describe methods of additional analyses (e.g., sensitivity or subgroup analyses, meta-regression), if done, indicating which were pre-specified.                                                         | 4                  |
| <b>RESULTS</b>                |    |                                                                                                                                                                                                          |                    |
| Study selection               | 17 | Give numbers of studies screened, assessed for eligibility, and included in the review, with reasons for exclusions at each stage, ideally with a flow diagram.                                          | 5                  |
| Study characteristics         | 18 | For each study, present characteristics for which data were extracted (e.g., study size, PICOS, follow-up period) and provide the citations.                                                             | 5                  |
| Risk of bias within studies   | 19 | Present data on risk of bias of each study and, if available, any outcome level assessment (see item 12).                                                                                                | 6                  |
| Results of individual studies | 20 | For all outcomes considered (benefits or harms), present, for each study: (a) simple summary data for each intervention group (b) effect estimates and confidence intervals, ideally with a forest plot. | 6-7                |
| Synthesis of results          | 21 | Present results of each meta-analysis done, including confidence intervals and measures of consistency.                                                                                                  | 5-6                |
| Risk of bias across studies   | 22 | Present results of any assessment of risk of bias across studies (see Item 15).                                                                                                                          | 6                  |
| Additional analysis           | 23 | Give results of additional analyses, if done (e.g., sensitivity or subgroup analyses, meta-regression [see Item 16]).                                                                                    | 6                  |
| <b>DISCUSSION</b>             |    |                                                                                                                                                                                                          |                    |
| Summary of evidence           | 24 | Summarize the main findings including the strength of evidence for each main outcome; consider their relevance to key groups (e.g., healthcare providers, users, and policy makers).                     | 6-7                |
| Limitations                   | 25 | Discuss limitations at study and outcome level (e.g., risk of bias), and at review-level (e.g., incomplete retrieval of identified research, reporting bias).                                            | 7-8                |
| Conclusions                   | 26 | Provide a general interpretation of the results in the context of other evidence, and implications for future research.                                                                                  | 8                  |
| <b>FUNDING</b>                |    |                                                                                                                                                                                                          |                    |
| Funding                       | 27 | Describe sources of funding for the systematic review and other support (e.g., supply of data); role of funders for the systematic review.                                                               | 8                  |

From: Moher D, Liberati A, Tetzlaff J, Altman DG, The PRISMA Group (2009). Preferred Reporting Items for Systematic Reviews and Meta-Analyses: The PRISMA Statement. PLoS Med 6(7): e1000097. doi:10.1371/journal.pmed1000097

For more information, visit: [www.prisma-statement.org](http://www.prisma-statement.org).

Page 2 of 2  
For peer review only - <http://bmjopen.bmj.com/site/about/guidelines.xhtml>



# BMJ Open

## Pentoxifylline for the prevention of contrast-induced nephropathy: systematic review and meta-analysis of randomized controlled trials

|                                 |                                                                                                                                                                                                                                                                                                            |
|---------------------------------|------------------------------------------------------------------------------------------------------------------------------------------------------------------------------------------------------------------------------------------------------------------------------------------------------------|
| Journal:                        | <i>BMJ Open</i>                                                                                                                                                                                                                                                                                            |
| Manuscript ID                   | bmjopen-2020-043436.R1                                                                                                                                                                                                                                                                                     |
| Article Type:                   | Original research                                                                                                                                                                                                                                                                                          |
| Date Submitted by the Author:   | 17-Nov-2020                                                                                                                                                                                                                                                                                                |
| Complete List of Authors:       | Wei, Ling; Second Xiangya Hospital, Department of Nephrology<br>Zhang, Weizhi; Second Xiangya Hospital, Department of Cardiothoracic Surgery<br>Yang, Yifeng; Second Xiangya Hospital, Department of Cardiothoracic Surgery<br>Li, Dongping; Second Xiangya Hospital, Department of Cardiothoracic Surgery |
| <b>Primary Subject Heading</b>: | Renal medicine                                                                                                                                                                                                                                                                                             |
| Secondary Subject Heading:      | Renal medicine                                                                                                                                                                                                                                                                                             |
| Keywords:                       | Radiation biology < RADIOTHERAPY, Interventional radiology < RADIOLOGY & IMAGING, Acute renal failure < NEPHROLOGY, Coronary intervention < CARDIOLOGY                                                                                                                                                     |
|                                 |                                                                                                                                                                                                                                                                                                            |

SCHOLARONE™  
Manuscripts



I, the Submitting Author has the right to grant and does grant on behalf of all authors of the Work (as defined in the below author licence), an exclusive licence and/or a non-exclusive licence for contributions from authors who are: i) UK Crown employees; ii) where BMJ has agreed a CC-BY licence shall apply, and/or iii) in accordance with the terms applicable for US Federal Government officers or employees acting as part of their official duties; on a worldwide, perpetual, irrevocable, royalty-free basis to BMJ Publishing Group Ltd ("BMJ") its licensees and where the relevant Journal is co-owned by BMJ to the co-owners of the Journal, to publish the Work in this journal and any other BMJ products and to exploit all rights, as set out in our [licence](#).

The Submitting Author accepts and understands that any supply made under these terms is made by BMJ to the Submitting Author unless you are acting as an employee on behalf of your employer or a postgraduate student of an affiliated institution which is paying any applicable article publishing charge ("APC") for Open Access articles. Where the Submitting Author wishes to make the Work available on an Open Access basis (and intends to pay the relevant APC), the terms of reuse of such Open Access shall be governed by a Creative Commons licence – details of these licences and which [Creative Commons](#) licence will apply to this Work are set out in our licence referred to above.

Other than as permitted in any relevant BMJ Author's Self Archiving Policies, I confirm this Work has not been accepted for publication elsewhere, is not being considered for publication elsewhere and does not duplicate material already published. I confirm all authors consent to publication of this Work and authorise the granting of this licence.

1  
2  
3  
4  
5  
6  
7  
8  
9  
10  
11

# **Pentoxifylline for the prevention of contrast-induced nephropathy: systematic review and meta-analysis of randomized controlled trials**

12  
13  
14  
15

Ling Wei<sup>1</sup>, Weizhi Zhang<sup>2</sup>, Yifeng Yang<sup>2</sup>, Dongping Li<sup>2</sup>

16  
17  
18  
19

<sup>1</sup> Department of Nephrology, The Second Xiangya Hospital, Central South University, Changsha, Hunan, China;

20  
21  
22  
23  
24  
25

<sup>2</sup> Department of Cardiothoracic Surgery, The Second Xiangya Hospital, Central South University, Changsha, Hunan, China

26  
27

Correspondence: Dongping Li

28  
29

Department of Cardiothoracic Surgery

30  
31

The Second Xiangya Hospital of Central South University

32  
33

139 Middle Renmin Road, Changsha, Hunan, 410011, China

34  
35

Tel: (+86) 731-8529-6106

36  
37

Fax: (+86) 731-8529-6606

38  
39  
40  
41  
42  
43  
44  
45  
46  
47  
48  
49  
50  
51  
52  
53  
54  
55  
56  
57  
58  
59  
60

Email: dongpingli@csu.edu.cn

**Abstract:**

**Objectives:** To summarize current evidence of pentoxifylline for the prevention of contrast-induced nephropathy

**Methods:** PubMed, Embase and CENTRAL database were searched for randomized controlled trials on patients with and without pentoxifylline undergoing contrast media exposure. We analyze the incidence of contrast-induced nephropathy and serum creatinine change before and after contrast media exposure. All statistical analyses were conducted with Review Manager v.5.3.

**Results:** We finally enrolled in seven randomized controlled trials with a total of 1484 patients in this analysis. All of 7 included studies were performed in patients undergoing angioplasty or stenting. The overall rate of CIN were 8.8% and 10.4% in the PTX groups and control groups, respectively. However, there is no significant reduction in CIN rate was observed in the patients treated with PTX compared to the control groups (OR 0.81, 95%CI 0.57, 1.13,  $I^2=0$ ,  $p=0.21$ ). All studies reported that no hospital mortality and the new requirement for dialysis during the trials.

**Conclusion:** Perioperative administration of pentoxifylline to patients undergoing angioplasty did not significantly reduce the development of contrast-induced nephropathy, but showed some weak tendency of lower serum creatinine increase. Based on the available trials, the evidence does not support the administration of pentoxifylline for the prevention of contrast-induced nephropathy. More trials with larger sample sizes are needed to evaluate the role of pentoxifylline in contrast-induced nephropathy prevention.

**Keywords:** pentoxifylline, contrast-induced nephropathy, angioplasty, serum creatinine change

## Strengths and limitations of this study

1. This is the first meta-analysis to summarize current evidence of pentoxifylline for the prevention of contrast-induced nephropathy
2. The results was reported according to PRISMA checklist and Cochrane handbook.

- 1  
2  
3 3. Given the small number of trials included in each analysis, we fail to assess the publication  
4 bias and small study effects with funnel plots.  
5  
6  
7  
8  
9

## 10 Introduction

11  
12  
13 Contrast-induced acute kidney injury, which is also known as Contrast-induced  
14 nephropathy (CIN), is defined as the development of acute kidney injury (AKI) following contrast  
15 medium exposure, without an alternative etiology <sup>1</sup>. With the wide application of cardiac  
16 catheterizations and nearly 30 million doses of contrast media injection annually <sup>2</sup>, CIN  
17 constitutes the third leading cause of hospital-acquired AKI <sup>3</sup>. CIN is associated with the in-  
18 hospital need for dialysis, long-term kidney failure and overall mortality, and consequently prolong  
19 hospital stay and increase the cost of hospitalization <sup>4</sup>. Even if serum creatinine (Scr) would  
20 recover to the baseline quickly in most CIN patients, they still suffer worse long-term outcomes  
21 than these without CIN <sup>5</sup>. In light of the vast threaten to people's health and public costs, it has  
22 become imperative to carry out work on the prevention of CIN.  
23  
24  
25  
26  
27  
28  
29  
30  
31

32 Pentoxifylline (PTX) is a methyl-xanthine derivative with powerful properties of  
33 antioxidation, anti-inflammation and anti-immunity. It is generally used to treat peripheral vascular  
34 diseases. PTX improves the flexibility and oxygen delivery capacity of the red blood cell, resulting  
35 in the improvement of hemodynamics. Besides, studies in animal models showed that PTX could  
36 effectively attenuate kidney injury induced by contrast media or *Escherichia coli* <sup>6,7</sup>. In fact,  
37 several clinical trials suggested that PTX may be a potential candidate for renal protection <sup>8-10</sup>.  
38  
39  
40  
41  
42  
43

44 PTX has been investigated in randomized controlled trials (RCTs) as a potential agent to  
45 prevent CIN <sup>11-17</sup>. However, neither systematic reviews nor meta-analyses have been conducted  
46 to date to the best of our knowledge. Therefore, we perform this systematic review and meta-  
47 analysis of currently available RCTs to summarize and evaluate the renal protective capacity of  
48 PTX under contrast media stress.  
49  
50  
51  
52  
53  
54  
55  
56  
57  
58  
59  
60

## Material and methods

### *Search strategy*

We searched electronic databases (PubMed, Embase and Cochrane Central Register of Controlled Trials (Central)) for potential clinical trials up to 29 June 2020 with no language restriction, using combinations of the main terms “contrast-induced nephropathy” and “pentoxifylline”. The details of the search strategy were shown in Appendix.1. Two authors (LW and DL) performed the literature search independently. We also checked relevant reviews and the reference lists of the original articles for further suitable publications.

### *Study selection*

LW and DL independently screened the titles, abstracts or full texts and assessed their eligibility. We included studies that met the following criteria: RCTs enrolled population underwent contrast media exposure; trials used PTX for prevention of CIN; and trials reported CIN rate and/or Scr change after exposure. The exclusion criteria were: animal studies; non RCTs; lack of necessary data. Any disagreements were resolved by discussion with a third author (ZW).

### *Data extraction*

Two independent reviewers (LW and DL) extracted data from each eligible study. Data extracted from studies included study characteristics, patient characteristics, details regarding PTX groups and control groups, and outcome assessments. Outcomes of interest for this study were the incidence of CIN and Scr change after exposure.

### *Risk of bias*

The risk of bias was assessed through the Cochrane Collaboration Tool. Six domains were evaluated: sequence generation for randomization, allocation concealment, blinding, incomplete outcome data, selective outcome reporting, and other sources of bias. Suppose one or more items rated as having a high risk of bias, or multiple items rated as “unclear risk”, studies were classified as “high risk”. Studies were classified as “low risk” when all components were rated as “low risk”.

## Outcomes

The primary outcome was the incidence of CIN, defined as a minimum 0.5mg/dl or 25% increase in Scr 48h after contrast media exposure. The secondary outcomes were Scr change after exposure, defined as the difference between Scr after and before the procedure; hospital mortality and the new requirement for dialysis. The general population was defined as Mehran score < 11, and the high-risk patients were defined as the population with Mehran score  $\geq$  11. Subgroup analysis of low- and high-risk patients was done when possible.

## Statistical analysis

Meta-analysis was performed using Review Manager 5.3. We used  $\text{Chi}^2$  and  $I^2$  were used to verify the heterogeneity among the studies. Values of the index of under 25%, between 25% and 50%, and over 50% indicated low, moderate, and high heterogeneity, respectively. Statistical significance of heterogeneity was set at a p-value of 0.05. If no substantial heterogeneity was observed ( $p \geq 0.05$  or  $I^2 < 50\%$ ), the fixed-effect model was used. Conversely, we presented the results with the random effect model. Mean difference (MD) and Odds ratio (OR) with the 95% confidence interval (CI) were used to evaluate the continuous and binary variables, respectively. Sensitivity analysis was performed to detect the robustness and reliability of our results, by sequentially omitting every single study. We used the funnel plot to evaluate the potential publication bias.

## Results

### *Study selection and characteristics of included studies*

Figure. 1 shown the literature searching process. We found 109 records from the database. After exclusion of duplicates and irrelevant studies (There are 21 reviews, 3 case report, 10 animal study, 5 comments, and 45 no relevant studies), we finally enrolled seven randomized controlled trials<sup>11-17</sup> with a total of 1484 patients in this meta-analysis. Characteristics of the included trials were presented in Table. 1. All of 7 included studies were performed in

1  
2  
3 patients undergoing angioplasty or stenting. Five of seven trials enrolled the general population  
4  
5 [11-15]; one study enrolled diabetic patients<sup>16</sup> and the remaining one enrolled high-risk patients<sup>17</sup>.  
6  
7 All the enrolled patients were pre-hydrated with normal saline. In addition, Aslanabadi's and  
8  
9 Barzi's studies<sup>16-7</sup> used oral 600 mg N-acetyl cysteine twice daily before and after the procedure.  
10  
11 There were 740 patients in the PTX groups and 744 in the control groups.  
12

### 13 **Primary outcome**

14  
15 Data on the incidence of CIN were available in all studies included in this meta-analysis.  
16  
17 The overall rate of CIN were 8.8% and 10.4% in the PTX groups and control groups, respectively.  
18  
19 However, there is no significant reduction in CIN rate was observed in the patients treated with  
20  
21 PTX compared to the control groups (OR 0.81, 95%CI 0.57, 1.13, I<sup>2</sup>=0, p=0.21) (Figure. 2).  
22  
23 Similarly, incidences of CIN were also comparable between groups in the the general  
24  
25 population subgroups (OR 0.79, 95%CI 0.56, 1.12, I<sup>2</sup>=8%, p=0.19) (Figure. 3).  
26  
27

### 28 **Secondary outcome**

29  
30 Data on Scr change after exposure were available in four of seven trials<sup>13, 15-17</sup>. However,  
31  
32 the study report by Eshraghi contributes most data. So the meta -analysis of Scr was waived. All  
33  
34 studies reported that no hospital mortality and the new requirement for dialysis during the trials.  
35  
36  
37

### 38 **Risk of bias assessment and sensitivity analysis**

39  
40  
41 The risk of bias is presented inFigure.4. Six studies did not use the placebo as control and  
42  
43 were thus not blinded<sup>11-16</sup>. However, as the development of CIN and Scr change are objectively  
44  
45 defined, and hence less likely to bias. Outcome assessors in all trials were blinded to the trial  
46  
47 protocol. All trials were free of selective outcome reporting.  
48

49 Given the limited number of studies included in this meta-analysis, the funnel plot is not  
50  
51 applicable for evaluating the publication bias and small-study effects.  
52  
53  
54  
55  
56  
57  
58  
59  
60



1  
2  
3 Sensitivity analysis was performed by sequentially omitting every single study. CIN rate  
4 remained comparable between groups after excluded each trial, indicating that our result was  
5 reliable and not skewed by a single dominant study.  
6  
7  
8  
9

## 10 Discussion

11  
12  
13 This is the first systematic review and meta-analysis to summarized current evidence of  
14 PTX for the prevention of CIN. The results suggested that perioperative administration of PTX to  
15 patients undergoing angioplasty or PCI significantly lower Scr increase but did not significantly  
16 reduce the development of AKI.  
17  
18  
19

20  
21 Our primary outcome was the incidence of CIN. There was no significant impact of PTX on  
22 this predefined primary outcome. A reasonable explanation was that although we pooled 7  
23 studies with a total of 1484 patients in this meta-analysis, the number of CIN rates was limited.  
24 Therefore, the CIs for CIN prevention effect of PTX treatment are wide and low statistical power  
25 results in poor precision. . Consequently, the results of these trails should be cautiously  
26 interpreted, and more trials with larger sample sizes are needed to evaluate the role of PTX in  
27 CIN prevention.  
28  
29  
30  
31  
32  
33

34 However, it is interesting to note that perioperative therapy of PTX did reduce Scr change  
35 in some studies<sup>13, 15-17</sup>, though the reduction was small( just 0.01-0.04 mg/dl) In a database  
36 analysis, Weisbord and colleagues reported that even a small increase (0.25 to 0.50 mg/dl) of the  
37 post-operation Scr had been associated with adverse outcomes in the coronary arteriography  
38 population <sup>18</sup>. Losito and colleagues also showed that the increase of Scr below the AKI threshold  
39 (a 20% increase) is still closely correlated with increased long-term mortality <sup>19</sup>. It would be  
40 interesting to study that if the reduction of Scr change and adverse outcomes would show a dose-  
41 response effect. Therefore, PTX's impact on Scr may raise growing interest in future studies as a  
42 potential agent for renoprotection to CIN. Besides, compared with de novo drug development for  
43 CIN prevention, repurposing PTX obviously saves money and time, and it can be speedily applied  
44 in clinical practice.  
45  
46  
47  
48  
49  
50  
51  
52  
53  
54  
55  
56  
57  
58  
59  
60

1  
2  
3 Effective prevention strategies and strengthen management are the key to reduce the CIN  
4 incidence. Choosing the optimal contrast medium, reducing contrast volume, and personalized  
5 hydration are direct and effective strategies to reduce CIN. In addition, remote ischemic  
6 preconditioning and statins have potential benefits for patients at risk for CIN, but their efficacy  
7 needs further study<sup>20-26</sup>.

8  
9  
10  
11  
12 CIN is a kind of AKI with complex and poorly understood mechanisms. Several studies  
13 have found that contrast media would lead to renal vascular contraction and subsequently  
14 decrease of peripheral medullary blood flow, resulting in renal tubular anoxia and oxidative stress  
15 injury<sup>27-28</sup>. Besides, a higher concentration of contrast agent in the renal tubular leads to  
16 viscosity increase and result in tubule blocked<sup>29</sup>. PTX is a methyl-xanthine derivative with multiple  
17 biochemical properties and is commonly used to treat peripheral vascular disease caused by  
18 peripheral vascular disease<sup>30</sup>. PTX is a non-selective inhibition of phosphodiesterases, which  
19 can increase the intracellular levels of cAMP, leading to an improvement of oxygen delivery and a  
20 decrease of oxygen free radicals production<sup>31</sup>. This property, together with its capability of  
21 reducing blood viscosity and therefore increasing intraglomerular pressure<sup>32-33</sup>, supporting the  
22 speculation on underlying renoprotective effects of PTX.

23  
24  
25  
26  
27  
28  
29  
30  
31  
32  
33  
34 The present study had several limitations. First, most studies use Scr to evaluate the renal  
35 function, and only 3 trials reported Scr changes before and after contrast media exposure. Future  
36 studies should use more sensitive markers to assess the renal function, allowing a  
37 comprehensive evaluation of the renal condition. Second, given the small number of trials  
38 included in each analysis, we fail to assess the publication bias and small study effects with  
39 funnel plots. Third, it would have been interesting to know if PTX treatment in subgroups such as  
40 the elderly and women would also be favorable compared to control. However, we failed to make  
41 a subgroup analysis because of lacking data.

## Conclusion

Perioperative administration of PTX to patients undergoing PCI or angioplasty significantly lower Scr increase but did not significantly reduce the development of CIN. PTX might be a potential agent for renoprotection to CIN.

## Acknowledgments

None

## Disclosure

The author reports no conflicts of interest in this work.

## Data availability

All data relevant to the study are included in the article or uploaded as supplementary information

## Funding

This study was supported by the National Natural Science Foundation of China (2017YFC1308102)

## Patient and public involvement

Since this is a meta-analysis, no patient and public involved in the design and the implementation of this study.

## Author's Contributions

(I)Conception and design: D.L (II) Administrative support: Y.Y and W.Z (III) Provision of study materials or patients: L.W and D.L (IV) Collection and assembly of data: L.W and D.L (V) Data

analysis and interpretation: L.W and D.L (VI) Manuscript writing: All authors (VII) Final approval of manuscript: All authors

**Word count:** 3622

## References

1. Azzalini L, Spagnoli V, Ly HQ. Contrast-Induced Nephropathy: From Pathophysiology to Preventive Strategies. *Can J Cardiol.* 2016;32(2):247-255.
2. Solomon R. Contrast media: are there differences in nephrotoxicity among contrast media? *Biomed Res Int.* 2014;2014:934947.
3. Nash K, Hafeez A, Hou S. Hospital-acquired renal insufficiency. *Am J Kidney Dis.* 2002;39(5):930-936.
4. Abe M, Morimoto T, Akao M, et al. Relation of contrast-induced nephropathy to long-term mortality after percutaneous coronary intervention. *Am J Cardiol.* 2014;114(3):362-368.
5. Wi J, Ko YG, Kim JS, et al. Impact of contrast-induced acute kidney injury with transient or persistent renal dysfunction on long-term outcomes of patients with acute myocardial infarction undergoing percutaneous coronary intervention. *Heart.* 2011;97(21):1753-1757.
6. Yang SK, Duan SB, Pan P, Xu XQ, Liu N, Xu J. Preventive effect of pentoxifylline on contrast-induced acute kidney injury in hypercholesterolemic rats. *Exp Ther Med.* 2015;9(2):384-388.
7. Groesdonk HV, Bauer A, Kreft B, Heringlake M, Paarmann H, Pagel H. Urodilatin and pentoxifylline prevent the early onset of Escherichia coli-induced acute renal failure in a model of isolated perfused rat kidney. *Kidney Blood Press Res.* 2009;32(2):81-90.
8. Perkins RM, Aboudara MC, Uy AL, Olson SW, Cushner HM, Yuan CM. Effect of pentoxifylline on GFR decline in CKD: a pilot, double-blind, randomized, placebo-controlled trial. *Am J Kidney Dis.* 2009;53(4):606-616.

- 1  
2  
3 **9.** Navarro-González JF, Mora-Fernández C, Muros DFM, et al. Effect of pentoxifylline on  
4 renal function and urinary albumin excretion in patients with diabetic kidney disease: the  
5 PREDIAN trial. *J Am Soc Nephrol.* 2015;26(1):220-229.  
6
- 7  
8 **10.** Chen PM, Lai TS, Chen PY, et al. Renoprotective effect of combining pentoxifylline with  
9 angiotensin-converting enzyme inhibitor or angiotensin II receptor blocker in advanced chronic  
10 kidney disease. *J Formos Med Assoc.* 2014;113(4):219-226.  
11
- 12  
13 **11.** Firouzi A, Eshraghi A, Shakerian F, et al. Efficacy of pentoxifylline in prevention of  
14 contrast-induced nephropathy in angioplasty patients. *Int Urol Nephrol.* 2012;44(4):1145-1149.  
15
- 16  
17 **12.** Shakeryan F, Sanati H, Fathi H, et al. Evaluation of combination therapy with vitamin C  
18 and pentoxifylline on preventing kidney failure secondary to intravenous contrast material in  
19 coronary angioplasty. *Iranian Heart Journal.* 2013;14(3):17-21.  
20
- 21  
22 **13.** Yavari V, Ostovan MA, Kojuri J, et al. The preventive effect of pentoxifylline on contrast-  
23 induced nephropathy: A randomized clinical trial. *Int Urol Nephrol.* 2014;46(1):41-46.  
24
- 25  
26 **14.** Firouzi A, Shahsavari H, Kiani R, Aeinfar K, Shamloo Y, Mortezaian H. Evaluation of  
27 pentoxifylline in the prevention of contrast-induced nephropathy in patients undergoing primary  
28 percutaneous coronary intervention. *Iranian Heart Journal.* 2015;16(4):28-34.  
29
- 30  
31 **15.** Eshraghi A, Naranji-Sani R, Pourzand H, et al. Pentoxifylline and prevention of contrast-  
32 induced nephropathy: Is it efficient in patients with myocardial infarction undergoing coronary  
33 angioplasty? *ARYA Atherosclerosis.* 2016;12(5):1-5.  
34
- 35  
36 **16.** Aslanabadi N, Afsar GR, Moharramzadeh S, Entezari-Maleki T. Pentoxifylline for the  
37 prevention of contrast-induced nephropathy in diabetic patients undergoing angioplasty: a  
38 randomized controlled trial. *Int Urol Nephrol.* 2019;51(4):699-705.  
39
- 40  
41 **17.** Barzi F, Miri R, Sadeghi R, et al. A randomized double blind placebo controlled trial  
42 examining the effects of pentoxifylline on contrast induced nephropathy reduction after  
43 percutaneous coronary intervention in high risk candidates. *Iran J Pharm Res.* 2019;18(2):1040-  
44 1046.  
45  
46  
47  
48  
49  
50  
51  
52  
53  
54  
55  
56  
57  
58  
59  
60

- 1  
2  
3 **18.** Weisbord SD, Chen H, Stone RA, et al. Associations of increases in serum creatinine  
4 with mortality and length of hospital stay after coronary angiography. *J Am Soc Nephrol.*  
5 2006;17(10):2871-2877.  
6  
7  
8 **19.** Losito A, Nunzi E, Pittavini L, Zampi I, Zampi E. Cardiovascular morbidity and long term  
9 mortality associated with in hospital small increases of serum creatinine. *J Nephrol.*  
10 2018;31(1):71-77.  
11  
12 **20.** B.J. Barrett, E.J. Carlisle, Metaanalysis of the relative nephrotoxicity of high- and low-  
13 osmolality iodinated contrast media. *Radiology* 188 (1) (1993) 171–178.  
14  
15 **21.** P. Aspelin, P. Aubry, S.G. Fransson, R. Strasser, R. Willenbrock, K.J. Berg, Nephrotoxic  
16 effects in high-risk patients undergoing angiography, *N. Engl. J. Med.* 348 (6) (2003) 491–499  
17  
18 **22.** R. Mehran, G.D. Dangas, S.D. Weisbord, Contrast-associated acute kidney injury, *N. Engl.*  
19 *J. Med.* 380 (22) (2019) 2146–2155  
20  
21 **23.** G. Qian, Z. Fu, J. Guo, F. Cao, Y. Chen, Prevention of contrast-induced nephropathy by  
22 central venous pressure-guided fluid administration in chronic kidney  
23 disease and congestive heart failure patients, *JACC Cardiovasc Interv.* 9 (1) (2016)89–96  
24  
25 **24.** S.S. Brar, V. Aharonian, P. Mansukhani, N. Moore, A.Y. Shen, M. Jorgensen, A. Dua, L.  
26 Short, K. Kane, Haemodynamic-guided fluid administration for the prevention of contrast-induced  
27 acute kidney injury: the POSEIDON randomized controlled trial, *Lancet.* 383 (9931) (2014) 1814–  
28 1823  
29  
30 **25.** M. Leoncini, A. Toso, M. Maioli, F. Tropeano, S. Villani, F. Bellandi, Early highdose  
31 rosuvastatin for contrast-induced nephropathy prevention in acute coronary syndrome: results  
32 from the PRATO-ACS study (protective effect of rosuvastatin and antiplatelet therapy on contrast-  
33 induced acute kidney injury and myocardial damage in patients with acute coronary syndrome), *J.*  
34 *Am. Coll. Cardiol.* 63 (1) (2014) 71–79  
35  
36 **26.** F. Er, A.M. Nia, H. Dopp, M. Hellmich, K.M. Dahlem, E. Caglayan, T. Kubacki, T. Benzing,  
37 E. Erdmann, V. Burst, N. Gassanov, Ischemic preconditioning for prevention of contrast medium-  
38 induced nephropathy: randomized pilot RenPro trial (renal protection trial), *Circulation.* 126 (3)  
39 (2012) 296–303  
40  
41  
42  
43  
44  
45  
46  
47  
48  
49  
50  
51  
52  
53  
54  
55  
56  
57  
58  
59  
60

- 1  
2  
3  
4  
5  
6  
7  
8  
9  
10  
11  
12  
13  
14  
15  
16  
17  
18  
19  
20  
21  
22  
23  
24  
25  
26  
27  
28  
29  
30  
31  
32  
33  
34  
35  
36  
37  
38  
39  
40  
41  
42  
43  
44  
45  
46  
47  
48  
49  
50  
51  
52  
53  
54  
55  
56  
57  
58  
59  
60
- 27.** Mccullough PA, Stacul F, Davidson C, Becker CR, Tumlin J. Contrast-induced nephropathy: Clinical insights and practical guidance - A report from the CIN Consensus Working Panel - Overview. *American Journal of Cardiology* 98(6A, Suppl. S): 2K-4K. 2006;98(6A):2K-4K.
- 28.** Moreau JF, Droz D, Noel LH, Leibowitch J, Jungers P, Michel JR. Tubular nephrotoxicity of water-soluble iodinated contrast media. *Invest Radiol.* 1980;15(6 Suppl):S54-S60.
- 29.** Sendeski M, Patzak A, Pallone TL, Cao C, Persson AE, Persson PB. Iodixanol, constriction of medullary descending vasa recta, and risk for contrast medium-induced nephropathy. *Radiology.* 2009;251(3):697-704.
- 30.** Seeliger E, Lenhard DC, Persson PB. Contrast media viscosity versus osmolality in kidney injury: lessons from animal studies. *Biomed Res Int.* 2014;2014:358136.
- 31.** De Sanctis MT, Cesarone MR, Belcaro G, et al. Treatment of intermittent claudication with pentoxifylline: a 12-month, randomized trial--walking distance and microcirculation. *Angiology.* 2002;53 Suppl 1:S7-S12.
- 32.** Lugnier C. Cyclic nucleotide phosphodiesterase (PDE) superfamily: a new target for the development of specific therapeutic agents. *Pharmacol Ther.* 2006;109(3):366-398.
- 33.** Dettelbach HR, Aviado DM. Clinical pharmacology of pentoxifylline with special reference to its hemorrheologic effect for the treatment of intermittent claudication. *J Clin Pharmacol.* 1985;25(1):8-26.

**Table 1** Baseline characteristics of included studies.

| Study ID        | PTX dosage regimen                                                | Contrast media      | CIN definition                                              | Number |         | Outcomes               | CIN number |         |
|-----------------|-------------------------------------------------------------------|---------------------|-------------------------------------------------------------|--------|---------|------------------------|------------|---------|
|                 |                                                                   |                     |                                                             | PTX    | Control |                        | PTX        | Control |
| Firouzi 2012    | 400mg/Tid from 24h before to 24h after procedure                  | Ultravist/Visipaque | Minimum 0.5mg/dl or 25% increase in Scr 48h after procedure | 140    | 146     | CIN rate               | 12         | 20      |
| Shakeryan 2013  | 400mg/Tid from 24h before to 24h after procedure                  | Visipaque           | Minimum 0.5mg/dl or 25% increase in Scr 48h after procedure | 164    | 164     | CIN rate               | 14         | 23      |
| Yavari 2014     | 400mg/Tid from 24h before to 24h after procedure                  | Visipaque           | Minimum 25% increase in Scr 48h after procedure             | 97     | 102     | CIN rate/ $\Delta$ Scr | 6          | 6       |
| Firouzi 2015    | 400mg/Tid from the initiation of the study to 24h after procedure | Ultravist/Visipaque | Minimum 0.5mg/dl or 25% increase in Scr 48h after procedure | 148    | 148     | CIN rate               | 18         | 22      |
| Eshraghi 2016   | 400mg/Tid from the initiation of the study to 24h after procedure | Visipaque           | Minimum 0.5mg/dl or 25% increase in Scr 48h after procedure | 91     | 84      | CIN rate/ $\Delta$ Scr | 6          | 8       |
| Aslanabadi 2019 | 1200mg /once 2-4h before procedure                                | Visipaque           | Minimum 0.5mg/dl or 25% increase in Scr 24h after procedure | 45     | 45      | CIN rate/ $\Delta$ Scr | 4          | 3       |
| Barzi 2019      | 400mg/Tid from 24h before to 48h after procedure                  | Visipaque 320       | Minimum 0.5mg/dl increase in Scr 24h after procedure        | 55     | 55      | CIN rate/ $\Delta$ Scr | 2          | 2       |

**Notes:** Tid, Three Times a Day;  $\Delta$  Scr, serum creatinine change before and after contrast media exposure

**Abbreviations:** CIN, contrast-induced nephropathy; Scr, serum creatinine



1  
2  
3 **Figure legends**  
4

5 **Figure 1** Flow chart of the literature searching process.  
6  
7

8  
9 **Figure. 2** Evaluation of the incidence of contrast-induced nephropathy between the  
10 pentoxifylline group and the control.  
11  
12

13  
14 **Figure. 3** Evaluation of the incidence of contrast-induced nephropathy in the the general  
15 population subgroups between the pentoxifylline group and the control.  
16  
17

18  
19 **Figure. 4** Risk of bias assessment of included studies..  
20  
21  
22  
23  
24  
25  
26  
27  
28  
29  
30  
31  
32  
33  
34  
35  
36  
37  
38  
39  
40  
41  
42  
43  
44  
45  
46  
47  
48  
49  
50  
51  
52  
53  
54  
55  
56  
57  
58  
59  
60

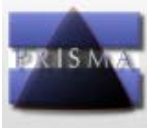

## PRISMA 2009 Flow Diagram

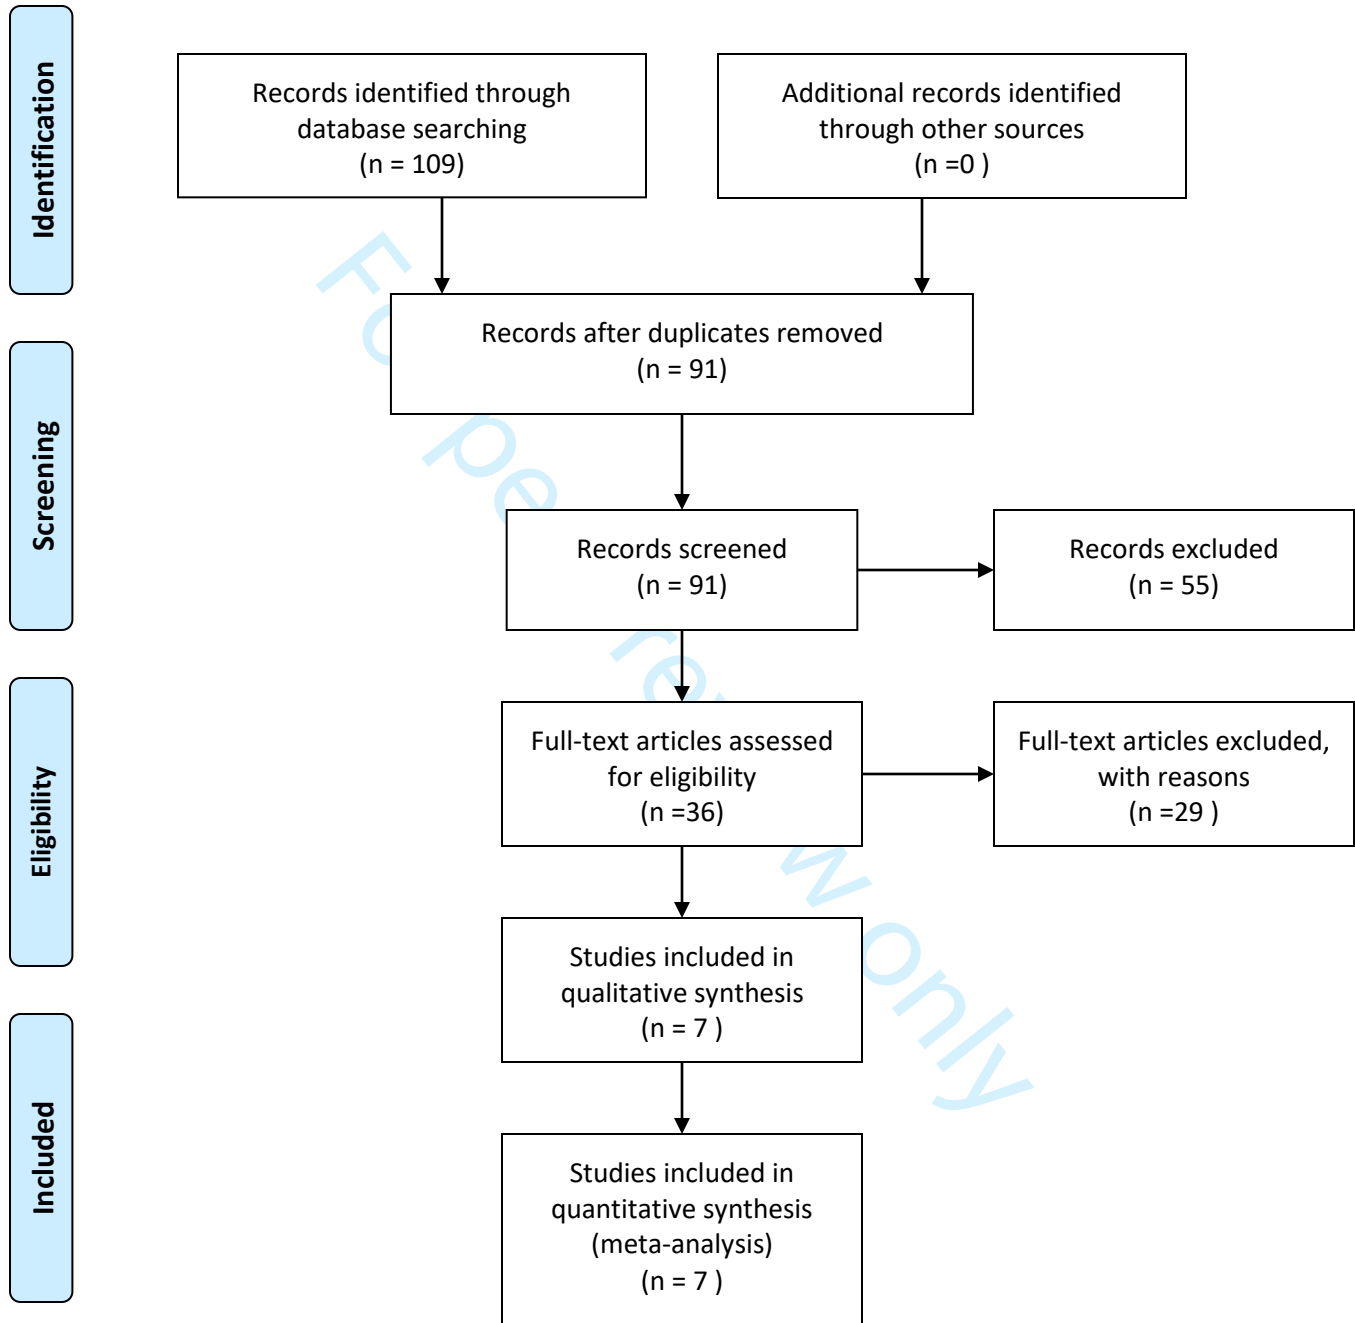

From: Moher D, Liberati A, Tetzlaff J, Altman DG, The PRISMA Group (2009). Preferred Reporting Items for Systematic Reviews and Meta-Analyses: The PRISMA Statement. PLoS Med 6(7): e1000097. doi:10.1371/journal.pmed1000097

For more information, visit [www.prisma-statement.org](http://www.prisma-statement.org).

For peer review only - <http://bmjopen.bmj.com/site/about/guidelines.xhtml>

1  
2  
3  
4  
5  
6  
7  
8  
9  
10  
11  
12  
13  
14  
15  
16  
17  
18  
19  
20  
21  
22  
23  
24  
25  
26  
27  
28  
29  
30  
31  
32  
33  
34  
35  
36  
37  
38  
39  
40  
41  
42  
43  
44  
45  
46  
47  
48  
49  
50  
51  
52  
53  
54  
55  
56  
57  
58  
59  
60

For p

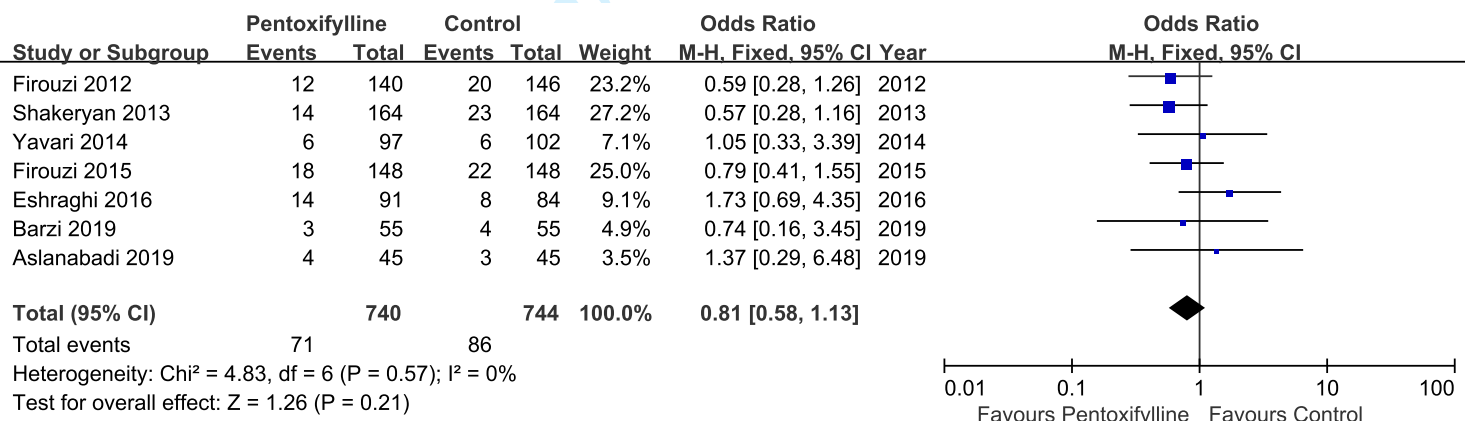

Only

1  
2  
3  
4  
5  
6  
7  
8  
9  
10  
11  
12  
13  
14  
15  
16  
17  
18  
19  
20  
21  
22  
23  
24  
25  
26  
27  
28  
29  
30  
31  
32  
33  
34  
35  
36  
37  
38  
39  
40  
41  
42  
43  
44  
45  
46  
47  
48  
49  
50  
51  
52  
53  
54  
55  
56  
57  
58  
59  
60

For peer review only



Only

1  
2  
3  
4  
5  
6  
7  
8  
9  
10  
11  
12  
13  
14  
15  
16  
17  
18  
19  
20  
21  
22  
23  
24  
25  
26  
27  
28  
29  
30  
31  
32  
33  
34  
35  
36  
37  
38  
39  
40  
41  
42  
43  
44  
45  
46  
47  
48  
49  
50  
51  
52  
53  
54  
55  
56  
57  
58  
59  
60

|                 | Random sequence generation (selection bias) | Allocation concealment (selection bias) | Blinding of participants and personnel (performance bias) | Blinding of outcome assessment (detection bias) | Incomplete outcome data (attrition bias) | Selective reporting (reporting bias) | Other bias |
|-----------------|---------------------------------------------|-----------------------------------------|-----------------------------------------------------------|-------------------------------------------------|------------------------------------------|--------------------------------------|------------|
| Aslanabadi 2019 |                                             |                                         |                                                           |                                                 |                                          |                                      |            |
| Barzi 2019      |                                             |                                         |                                                           |                                                 |                                          |                                      |            |
| Eshraghi 2016   |                                             |                                         |                                                           |                                                 |                                          |                                      |            |
| Firouzi 2012    |                                             |                                         |                                                           |                                                 |                                          |                                      |            |
| Firouzi 2015    |                                             |                                         |                                                           |                                                 |                                          |                                      |            |
| Shakeryan 2013  |                                             |                                         |                                                           |                                                 |                                          |                                      |            |
| Yavari 2014     |                                             |                                         |                                                           |                                                 |                                          |                                      |            |

## Pubmed

((contrast induced nephropathy[MeSH Terms]) OR (((("contrast media"[MeSH Terms]) OR ("contrast media"[Title/Abstract])) OR ("contrast medium"[Title/Abstract])) OR ("contrast material"[Title/Abstract])) AND (((((((((acute kidney failure[MeSH Terms]) OR (kidney diseases[MeSH Terms])) OR ("kidney diseases")) OR ("nephropathy")) OR ("acute kidney injury")) OR ("kidney disease")) OR ("acute kidney injury")) OR ("acute renal injury")) OR ("renal disease")) OR ("renal diseases")))) AND (((("pentoxifylline"[MeSH Terms]) OR ("pentoxifylline"[Title/Abstract])) OR ("oxpentifylline"[Title/Abstract])) OR ("trental"[Title/Abstract])) OR ("Torental"[Title/Abstract])) OR ("BL - 191"[Title/Abstract]))

## Embase

### Session Results

| No.  | Query Results                                                                                                                                      | Results   | Date        |
|------|----------------------------------------------------------------------------------------------------------------------------------------------------|-----------|-------------|
| #12. | #3 AND #11                                                                                                                                         | 82        | 29 Jun 2020 |
| #11. | #4 OR #10                                                                                                                                          | 20,804    | 29 Jun 2020 |
| #10. | #8 AND #9                                                                                                                                          | 18,782    | 29 Jun 2020 |
| #9.  | #5 OR #6 OR #7                                                                                                                                     | 1,032,150 | 29 Jun 2020 |
| #8.  | 'contrast medium'/exp OR 'contrast agent':ti,ab,kw OR 'contrast media':ti,ab,kw OR 'contrast material':ti,ab,kw OR 'contrast medium':ti,ab,kw      | 195,954   | 29 Jun 2020 |
| #7.  | 'kidney disease':ti,ab,kw OR 'nephropathy':ti,ab,kw OR 'acute kidney injury':ti,ab,kw OR 'renal disease':ti,ab,kw OR 'acute renal injury':ti,ab,kw | 269,746   | 29 Jun 2020 |
| #6.  | 'acute kidney failure'/exp                                                                                                                         | 88,480    | 29 Jun 2020 |
| #5.  | 'kidney disease'/exp                                                                                                                               | 1,004,086 | 29 Jun 2020 |
| #4.  | 'contrast induced nephropathy'/exp                                                                                                                 | 4,953     | 29 Jun 2020 |
| #3.  | #1 OR #2                                                                                                                                           | 14,012    | 29 Jun 2020 |
| #2.  | 'pentoxifylline':ti,ab,kw OR 'oxpentifylline':ti,ab,kw OR 'trental':ti,ab,kw OR 'torental':ti,ab,kw OR 'bl - 191':ti,ab,kw                         | 5,902     | 29 Jun 2020 |
| #1.  | 'pentoxifylline'/exp                                                                                                                               | 13,629    | 29 Jun 2020 |

## Central

#1 MeSH descriptor: [Kidney Diseases] explode all trees 15824  
 #2 ("kidney disease"):ti,ab,kw OR ("nephropathy"):ti,ab,kw OR ("acute kidney injury"):ti,ab,kw OR ("renal disease"):ti,ab,kw OR ("acute renal injury"):ti,ab,kw (Word variations have been searched)24798

1  
2  
3 #3 MeSH descriptor: [Contrast Media] explode all trees 2673  
4 #4 ("contrast agent"):ti,ab,kw OR ("contrast media"):ti,ab,kw OR ("contrast material"):ti,ab,kw  
5 OR ("contrast-medium"):ti,ab,kw (Word variations have been searched) 5166  
6  
7 #5 #1 OR #2 31673  
8 #6 #3 or #4 5166  
9  
10 #7 #5 AND #6 992  
11 #8 MeSH descriptor: [Pentoxifylline] explode all trees 574  
12 #9 ("pentoxifylline"):ti,ab,kw OR ("oxpentifylline"):ti,ab,kw OR ("trental"):ti,ab,kw OR  
13 ("Torental"):ti,ab,kw OR ("PTF"):ti,ab,kw (Word variations have been searched) 1380  
14 #10 ("PTXF"):ti,ab,kw OR ("agapurin"):ti,ab,kw OR ("BL - 191"):ti,ab,kw (Word variations have  
15 been searched) 10  
16 #11 #8 OR #9 OR #10 1381  
17 #12 #7 AND #11 14  
18  
19  
20  
21  
22  
23  
24  
25  
26  
27  
28  
29  
30  
31  
32  
33  
34  
35  
36  
37  
38  
39  
40  
41  
42  
43  
44  
45  
46  
47  
48  
49  
50  
51  
52  
53  
54  
55  
56  
57  
58  
59  
60

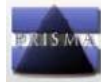

# PRISMA 2009 Checklist

| Section/topic                      | #  | Checklist item                                                                                                                                                                                                                                                                                              | Reported on page # |
|------------------------------------|----|-------------------------------------------------------------------------------------------------------------------------------------------------------------------------------------------------------------------------------------------------------------------------------------------------------------|--------------------|
| <b>TITLE</b>                       |    |                                                                                                                                                                                                                                                                                                             |                    |
| Title                              | 1  | Identify the report as a systematic review, meta-analysis, or both.                                                                                                                                                                                                                                         | 1                  |
| <b>ABSTRACT</b>                    |    |                                                                                                                                                                                                                                                                                                             |                    |
| Structured summary                 | 2  | Provide a structured summary including, as applicable: background; objectives; data sources; study eligibility criteria, participants, and interventions; study appraisal and synthesis methods; results; limitations; conclusions and implications of key findings; systematic review registration number. | 2                  |
| <b>INTRODUCTION</b>                |    |                                                                                                                                                                                                                                                                                                             |                    |
| Rationale                          | 3  | Describe the rationale for the review in the context of what is already known.                                                                                                                                                                                                                              | 3                  |
| Objectives                         | 4  | Provide an explicit statement of questions being addressed with reference to participants, interventions, comparisons, outcomes, and study design (PICOS).                                                                                                                                                  | 3                  |
| <b>METHODS</b>                     |    |                                                                                                                                                                                                                                                                                                             |                    |
| Protocol and registration          | 5  | Indicate if a review protocol exists, if and where it can be accessed (e.g., Web address), and, if available, provide registration information including registration number.                                                                                                                               | N                  |
| Eligibility criteria               | 6  | Specify study characteristics (e.g., PICOS, length of follow-up) and report characteristics (e.g., years considered, language, publication status) used as criteria for eligibility, giving rationale.                                                                                                      | 3-4                |
| Information sources                | 7  | Describe all information sources (e.g., databases with dates of coverage, contact with study authors to identify additional studies) in the search and date last searched.                                                                                                                                  | 3-4                |
| Search                             | 8  | Present full electronic search strategy for at least one database, including any limits used, such that it could be repeated.                                                                                                                                                                               | 3-4                |
| Study selection                    | 9  | State the process for selecting studies (i.e., screening, eligibility, included in systematic review, and, if applicable, included in the meta-analysis).                                                                                                                                                   | 4                  |
| Data collection process            | 10 | Describe method of data extraction from reports (e.g., piloted forms, independently, in duplicate) and any processes for obtaining and confirming data from investigators.                                                                                                                                  | 4                  |
| Data items                         | 11 | List and define all variables for which data were sought (e.g., PICOS, funding sources) and any assumptions and simplifications made.                                                                                                                                                                       | 4                  |
| Risk of bias in individual studies | 12 | Describe methods used for assessing risk of bias of individual studies (including specification of whether this was done at the study or outcome level), and how this information is to be used in any data synthesis.                                                                                      | 4                  |
| Summary measures                   | 13 | State the principal summary measures (e.g., risk ratio, difference in means).                                                                                                                                                                                                                               | 5                  |
| Synthesis of results               | 14 | Describe the methods of handling data and combining results of studies, if done, including measures of consistency (e.g., I <sup>2</sup> ) for each meta-analysis.                                                                                                                                          | 5                  |



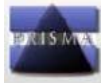

# PRISMA 2009 Checklist

Page 1 of 2

| Section/topic                 | #  | Checklist item                                                                                                                                                                                           | Reported on page # |
|-------------------------------|----|----------------------------------------------------------------------------------------------------------------------------------------------------------------------------------------------------------|--------------------|
| Risk of bias across studies   | 15 | Specify any assessment of risk of bias that may affect the cumulative evidence (e.g., publication bias, selective reporting within studies).                                                             | 4                  |
| Additional analyses           | 16 | Describe methods of additional analyses (e.g., sensitivity or subgroup analyses, meta-regression), if done, indicating which were pre-specified.                                                         | 4                  |
| <b>RESULTS</b>                |    |                                                                                                                                                                                                          |                    |
| Study selection               | 17 | Give numbers of studies screened, assessed for eligibility, and included in the review, with reasons for exclusions at each stage, ideally with a flow diagram.                                          | 5                  |
| Study characteristics         | 18 | For each study, present characteristics for which data were extracted (e.g., study size, PICOS, follow-up period) and provide the citations.                                                             | 5                  |
| Risk of bias within studies   | 19 | Present data on risk of bias of each study and, if available, any outcome level assessment (see item 12).                                                                                                | 6                  |
| Results of individual studies | 20 | For all outcomes considered (benefits or harms), present, for each study: (a) simple summary data for each intervention group (b) effect estimates and confidence intervals, ideally with a forest plot. | 6-7                |
| Synthesis of results          | 21 | Present results of each meta-analysis done, including confidence intervals and measures of consistency.                                                                                                  | 5-6                |
| Risk of bias across studies   | 22 | Present results of any assessment of risk of bias across studies (see Item 15).                                                                                                                          | 6                  |
| Additional analysis           | 23 | Give results of additional analyses, if done (e.g., sensitivity or subgroup analyses, meta-regression [see Item 16]).                                                                                    | 6                  |
| <b>DISCUSSION</b>             |    |                                                                                                                                                                                                          |                    |
| Summary of evidence           | 24 | Summarize the main findings including the strength of evidence for each main outcome; consider their relevance to key groups (e.g., healthcare providers, users, and policy makers).                     | 6-7                |
| Limitations                   | 25 | Discuss limitations at study and outcome level (e.g., risk of bias), and at review-level (e.g., incomplete retrieval of identified research, reporting bias).                                            | 7-8                |
| Conclusions                   | 26 | Provide a general interpretation of the results in the context of other evidence, and implications for future research.                                                                                  | 8                  |
| <b>FUNDING</b>                |    |                                                                                                                                                                                                          |                    |
| Funding                       | 27 | Describe sources of funding for the systematic review and other support (e.g., supply of data); role of funders for the systematic review.                                                               | 8                  |

From: Moher D, Liberati A, Tetzlaff J, Altman DG, The PRISMA Group (2009). Preferred Reporting Items for Systematic Reviews and Meta-Analyses: The PRISMA Statement. PLoS Med 6(7): e1000097. doi:10.1371/journal.pmed1000097

For more information, visit: [www.prisma-statement.org](http://www.prisma-statement.org).

Page 2 of 2  
For peer review only - <http://bmjopen.bmj.com/site/about/guidelines.xhtml>

# BMJ Open

## Pentoxifylline for the prevention of contrast-induced nephropathy: systematic review and meta-analysis of randomized controlled trials

|                                 |                                                                                                                                                                                                                                                                                                            |
|---------------------------------|------------------------------------------------------------------------------------------------------------------------------------------------------------------------------------------------------------------------------------------------------------------------------------------------------------|
| Journal:                        | <i>BMJ Open</i>                                                                                                                                                                                                                                                                                            |
| Manuscript ID                   | bmjopen-2020-043436.R2                                                                                                                                                                                                                                                                                     |
| Article Type:                   | Original research                                                                                                                                                                                                                                                                                          |
| Date Submitted by the Author:   | 20-Jan-2021                                                                                                                                                                                                                                                                                                |
| Complete List of Authors:       | Wei, Ling; Second Xiangya Hospital, Department of Nephrology<br>Zhang, Weizhi; Second Xiangya Hospital, Department of Cardiothoracic Surgery<br>Yang, Yifeng; Second Xiangya Hospital, Department of Cardiothoracic Surgery<br>Li, Dongping; Second Xiangya Hospital, Department of Cardiothoracic Surgery |
| <b>Primary Subject Heading</b>: | Renal medicine                                                                                                                                                                                                                                                                                             |
| Secondary Subject Heading:      | Renal medicine                                                                                                                                                                                                                                                                                             |
| Keywords:                       | Radiation biology < RADIOTHERAPY, Interventional radiology < RADIOLOGY & IMAGING, Acute renal failure < NEPHROLOGY, Coronary intervention < CARDIOLOGY                                                                                                                                                     |
|                                 |                                                                                                                                                                                                                                                                                                            |

SCHOLARONE™  
Manuscripts



I, the Submitting Author has the right to grant and does grant on behalf of all authors of the Work (as defined in the below author licence), an exclusive licence and/or a non-exclusive licence for contributions from authors who are: i) UK Crown employees; ii) where BMJ has agreed a CC-BY licence shall apply, and/or iii) in accordance with the terms applicable for US Federal Government officers or employees acting as part of their official duties; on a worldwide, perpetual, irrevocable, royalty-free basis to BMJ Publishing Group Ltd ("BMJ") its licensees and where the relevant Journal is co-owned by BMJ to the co-owners of the Journal, to publish the Work in this journal and any other BMJ products and to exploit all rights, as set out in our [licence](#).

The Submitting Author accepts and understands that any supply made under these terms is made by BMJ to the Submitting Author unless you are acting as an employee on behalf of your employer or a postgraduate student of an affiliated institution which is paying any applicable article publishing charge ("APC") for Open Access articles. Where the Submitting Author wishes to make the Work available on an Open Access basis (and intends to pay the relevant APC), the terms of reuse of such Open Access shall be governed by a Creative Commons licence – details of these licences and which [Creative Commons](#) licence will apply to this Work are set out in our licence referred to above.

Other than as permitted in any relevant BMJ Author's Self Archiving Policies, I confirm this Work has not been accepted for publication elsewhere, is not being considered for publication elsewhere and does not duplicate material already published. I confirm all authors consent to publication of this Work and authorise the granting of this licence.

1  
2  
3 **Pentoxifylline for the prevention of contrast-induced**  
4  
5  
6 **nephropathy: systematic review and meta-analysis of**  
7  
8  
9 **randomized controlled trials**  
10

11  
12 Ling Wei<sup>1</sup>, Weizhi Zhang<sup>2</sup>, Yifeng Yang<sup>2</sup>, Dongping Li<sup>2</sup>  
13  
14

15  
16 <sup>1</sup> Department of Nephrology, The Second Xiangya Hospital, Central South University, Changsha,  
17 Hunan, China;  
18

19  
20 <sup>2</sup> Department of Cardiothoracic Surgery, The Second Xiangya Hospital, Central South University,  
21 Changsha, Hunan, China  
22  
23

24  
25  
26 Correspondence: Dongping Li

27 Department of Cardiothoracic Surgery

28 The Second Xiangya Hospital of Central South University

29 139 Middle Renmin Road, Changsha, Hunan, 410011, China

30 Tel: (+86) 731-8529-6106

31 Fax: (+86) 731-8529-6606

32 Email: dongpingli@csu.edu.cn  
33  
34  
35  
36  
37  
38  
39  
40  
41  
42  
43  
44  
45  
46  
47  
48  
49  
50  
51  
52  
53  
54  
55  
56  
57  
58  
59  
60

**Abstract:**

**Objectives:** To summarize current evidence on the use of pentoxifylline to prevent contrast-induced nephropathy (CIN).

**Methods:** The PubMed, Embase and CENTRAL databases were searched for randomized controlled trials including patients with and without pentoxifylline undergoing contrast media exposure. We analyzed the incidence of contrast-induced nephropathy and serum creatinine changes before and after contrast media exposure. All statistical analyses were conducted with Review Manager v.5.3.

**Results:** We finally enrolled in seven randomized controlled trials with a total of 1484 patients in this analysis. All of 7 included studies were performed in patients undergoing angioplasty or stenting. The overall rates of CIN were 8.8% and 10.4% in the PTX groups and control groups, respectively. However, no significant reduction in the CIN rate was observed in the patients treated with PTX compared to the control groups (OR 0.81, 95%CI 0.57, 1.13,  $I^2=0$ ,  $p=0.21$ ). All studies reported no hospital mortality and the new requirement for dialysis during the trials.

**Conclusion:** Perioperative administration of pentoxifylline to patients undergoing angioplasty did not significantly reduce the development of contrast-induced nephropathy, but showed some weak tendency of lower serum creatinine increase. Based on the available trials, the evidence does not support the administration of pentoxifylline for the prevention of contrast-induced nephropathy. More trials with larger sample sizes are needed to evaluate the role of pentoxifylline in contrast-induced nephropathy prevention.

**Keywords:** pentoxifylline, contrast-induced nephropathy, angioplasty, serum creatinine change

## Strengths and limitations of this study

1. This is the first meta-analysis to summarize current evidence of pentoxifylline for the prevention of contrast-induced nephropathy

2. The results were reported in accordance with the PRISMA checklist and Cochrane handbook.
3. Given the small number of trials included in each analysis, we failed to assess publication bias and small study effects with funnel plots.

## Introduction

Contrast-induced acute kidney injury, which is also known as contrast-induced nephropathy (CIN), is defined as the development of acute kidney injury (AKI) following contrast medium exposure, without an alternative etiology<sup>1</sup>. With the wide application of cardiac catheterizations and nearly 30 million doses of contrast media injection annually<sup>2</sup>, CIN constitutes the third leading cause of hospital-acquired AKI<sup>3</sup>. CIN is associated with the in-hospital need for dialysis, long-term kidney failure and overall mortality, and consequently prolongs hospital stay and increases the cost of hospitalization<sup>4</sup>. Even if serum creatinine (Scr) would recover to the baseline quickly in most CIN patients, these patients still suffer worse long-term outcomes than those without CIN<sup>5</sup>. In light of the vast threaten to people's health and public costs, it has become imperative to research the prevention of CIN.

Pentoxifylline (PTX) is a methyl-xanthine derivative with powerful antioxidative, anti-inflammatory and anti-immunity properties. It is generally used to treat peripheral vascular diseases. PTX improves the flexibility and oxygen delivery capacity of red blood cells, resulting in improved hemodynamics. In addition, studies in animal models showed that PTX could effectively attenuate kidney injury induced by contrast media or *Escherichia coli*<sup>6,7</sup>. In fact, several clinical trials have suggested that PTX may be a potential candidate for renal protection<sup>8-10</sup>.

PTX has been investigated in randomized controlled trials (RCTs) as a potential agent to prevent CIN<sup>11-17</sup>. However, neither systematic reviews nor meta-analyses have been conducted to date to the best of our knowledge. Therefore, we performed this systematic review and meta-analysis of currently available RCTs to summarize and evaluate the renal protective capacity of PTX under contrast media stress.

## Material and methods

### *Search strategy*

We searched electronic databases (PubMed, Embase and Cochrane Central Register of Controlled Trials (Central)) for potential clinical trials up to 29 June 2020 with no language restriction, using combinations of the main terms “contrast-induced nephropathy” and “pentoxifylline”. The details of the search strategy are shown in Appendix.1. Two authors (LW and DL) performed the literature search independently. We also checked relevant reviews and the reference lists of the original articles for further suitable publications.

### *Study selection*

LW and DL independently screened the titles, abstracts or full texts and assessed their eligibility. We included studies that met the following criteria: RCTs enrolled population underwent contrast media exposure; trials used PTX for prevention of CIN; and trials reported CIN rate and/or Scr change after exposure. The exclusion criteria were: animal studies; non-RCTs; lack of necessary data. Any disagreements were resolved by discussion with a third author (ZW).

### *Data extraction*

Two independent reviewers (LW and DL) extracted data from each eligible study. Data extracted from studies included study characteristics, patient characteristics, details regarding PTX groups and control groups, and outcome assessments. Outcomes of interest for this study were the incidence of CIN and Scr changes after exposure.

### *Risk of bias*

The risk of bias was assessed through the Cochrane Collaboration Tool. Six domains were evaluated: sequence generation for randomization, allocation concealment, blinding, incomplete outcome data, selective outcome reporting, and other sources of bias. According to Cochrane Handbook<sup>18</sup>, The risk of biases are classified into three categories, low risk, unclear risk, and high risk. Low risk meant all categories were classified as low risk. Unclear risk means one category

1  
2  
3 was classified as unclear risk. High risk means high risk of bias in one or more categories or an  
4  
5 unclear risk in two or more categories.

## 6 7 **Outcomes**

8  
9 The primary outcome was the incidence of CIN, defined as a minimum 0.5 mg/dl or 25%  
10 increase in Scr 48 h after contrast media exposure. The secondary outcomes were Scr change  
11 after exposure, defined as the difference between Scr after and before the procedure; hospital  
12 mortality and the new requirement for dialysis. The general population was defined as having a  
13 Mehran score < 11, and the high-risk patients were defined as the population with Mehran score  
14  $\geq 11$ . Subgroup analysis of low- and high-risk patients was performed when possible.  
15  
16  
17  
18  
19  
20

## 21 22 **Statistical analysis**

23  
24 Meta-analysis was performed using Review Manager 5.3. We used  $\text{Chi}^2$  and  $I^2$  to verify the  
25 heterogeneity among the studies. Values of the index of under 25%, between 25% and 50%, and  
26 over 50% indicated low, moderate, and high heterogeneity, respectively. Statistical significance of  
27 heterogeneity was set at a p-value of 0.05. If no substantial heterogeneity was observed ( $p \geq$   
28 0.05 or  $I^2 < 50\%$ ), the fixed-effect model was used. Conversely, we presented the results with the  
29 random effect model. Mean difference (MD) and odds ratio (OR) with the 95% confidence interval  
30 (CI) were used to evaluate the continuous and binary variables, respectively. Sensitivity analysis  
31 was performed to detect the robustness and reliability of our results, by sequentially omitting  
32 every single study. We used the funnel plot to evaluate the potential publication bias.  
33  
34  
35  
36  
37  
38  
39  
40  
41  
42

## 43 44 **Results**

### 45 46 ***Study selection and characteristics of included studies***

47  
48 Figure. 1 shown the literature searching process. We found 109 records from the  
49 database. After exclusion of duplicates and irrelevant studies (21 reviews, 3 case reports, 10  
50 animal studies, 5 comments, and 45 no relevant studies), we finally enrolled seven randomized  
51 controlled trials<sup>11-17</sup> with a total of 1484 patients in this meta-analysis. The characteristics of the  
52  
53  
54  
55  
56  
57  
58  
59  
60



1  
2  
3 included trials were presented in Table. 1. All of 7 included studies were performed in patients  
4  
5 undergoing angioplasty or stenting. Five of seven trials enrolled patients from the general  
6  
7 population<sup>11-15</sup>; one study enrolled diabetic patients<sup>16</sup> and the remaining study enrolled high-  
8  
9 risk patients<sup>17</sup>. All the enrolled patients were pre-hydrated with normal saline. In addition,  
10  
11 Aslanabadi's and Barzi's studies<sup>16-7</sup> used 600 mg N-acetyl cysteine orally twice daily before and  
12  
13 after the procedure. There were 740 patients in the PTX group and 744 in the control group.

### 14 15 **Primary outcome**

16  
17  
18 Data on the incidence of CIN were available in all studies included in this meta-analysis.  
19  
20 The overall rates of CIN were 8.8% and 10.4% in the PTX groups and control groups,  
21  
22 respectively. However, no significant reduction in the CIN rate was observed in the patients  
23  
24 treated with PTX compared to the control groups (OR 0.81, 95%CI 0.57, 1.13, I<sup>2</sup>=0, p=0.21)  
25  
26 (Figure. 2). Similarly, the incidences of CIN were also comparable between groups in the the  
27  
28 general population subgroups (OR 0.79, 95%CI 0.56, 1.12, I<sup>2</sup>=8%, p=0.19) (Figure. 3).

### 29 30 **Secondary outcome**

31  
32  
33 Data on Scr change after exposure were available in four of seven trials<sup>13, 15-17</sup>. However,  
34  
35 the study report by Eshraghi contributes most of the data. Thus the meta-analysis of Scr was  
36  
37 waived. All studies reported no hospital mortality or the new requirement for dialysis during the  
38  
39 trials.

### 40 41 42 **Risk of bias assessment and sensitivity analysis**

43  
44  
45 The risk of bias is presented in Figure.4. Six studies did not use the placebo as control and  
46  
47 were thus not blinded<sup>11-16</sup>. However, the development of CIN and Scr changes are objectively  
48  
49 defined, and hence less likely to bias. Outcome assessors in all trials were blinded to the trial  
50  
51 protocol. All trials were free of selective outcome reporting.

52  
53 Given the limited number of studies included in this meta-analysis, the funnel plot is not  
54  
55 applicable for evaluating the publication bias and small-study effects.

1  
2  
3 Sensitivity analysis was performed by sequentially omitting every single study. CIN rate  
4 remained comparable between groups after excluding each trial, indicating that our results were  
5 reliable and not skewed by a single dominant study.  
6  
7  
8  
9

## 10 Discussion

11  
12  
13 This is the first systematic review and meta-analysis to summarize current evidence of  
14 PTX for the prevention of CIN. The results suggested that perioperative administration of PTX to  
15 patients undergoing angioplasty or PCI significantly lower Scr increase but did not significantly  
16 reduce the development of AKI.  
17  
18  
19

20  
21 Our primary outcome was the incidence of CIN. There was no significant impact of PTX on  
22 this predefined primary outcome. A reasonable explanation was that although we pooled 7  
23 studies with a total of 1484 patients in this meta-analysis, the number of CIN rates was limited.  
24 Therefore, the CIs for the CIN prevention effect of PTX treatment are wide and low statistical  
25 power results in poor precision. Consequently, the results of these trials should be cautiously  
26 interpreted, and more trials with larger sample sizes are needed to evaluate the role of PTX in  
27 CIN prevention.  
28  
29  
30  
31  
32  
33

34 However, it is interesting to note that perioperative therapy with PTX did reduce Scr  
35 changes in some studies<sup>13, 15-17</sup>, although the reduction was small ( just 0.01-0.04 mg/dl) In a  
36 database analysis, Weisbord and colleagues reported that even a small increase (0.25 to 0.50  
37 mg/dl) in postoperative Scr was associated with adverse outcomes in the coronary arteriography  
38 population<sup>19</sup>. Losito and colleagues also showed that the increase in Scr below the AKI threshold  
39 (a 20% increase) is still closely correlated with increased long-term mortality<sup>20</sup>. It would be  
40 interesting to study whether the reduction of Scr change and adverse outcomes would show a  
41 dose-response effect. Therefore, PTX's impact on Scr may raise growing interest in future studies  
42 as a potential agent for renoprotection to CIN. Besides, compared with de novo drug  
43 development for CIN prevention, repurposing PTX obviously saves money and time, and it can be  
44 speedily applied in clinical practice.  
45  
46  
47  
48  
49  
50  
51  
52  
53  
54  
55  
56  
57  
58  
59  
60

1  
2  
3 Effective prevention strategies and strengthened management are the keys to reduce the  
4 CIN incidence. Choosing the optimal contrast medium, reducing contrast volume, and  
5 personalized hydration are direct and effective strategies to reduce CIN. In addition, remote  
6 ischemic preconditioning and statins have potential benefits for patients at risk for CIN, but their  
7 efficacy needs further study<sup>21-27</sup>.

8  
9  
10  
11  
12 CIN is a kind of AKI with complex and poorly understood mechanisms. Several studies  
13 have found that contrast media would lead to renal vascular contraction and a subsequent  
14 decrease of peripheral medullary blood flow, resulting in renal tubular anoxia and oxidative stress  
15 injury<sup>28-29</sup>. Besides, a higher concentration of contrast agent in the renal tubular leads to  
16 viscosity increase and results in tubule blocked<sup>30</sup>. PTX is a methyl-xanthine derivative with  
17 multiple biochemical properties and is commonly used to treat peripheral vascular disease  
18 caused by peripheral vascular disease<sup>31</sup>. PTX is a nonselective inhibitor of phosphodiesterases,  
19 which can increase the intracellular levels of cAMP, leading to an improvement of oxygen delivery  
20 and a decrease of oxygen free radicals production<sup>32</sup>. This property, together with its capability of  
21 reducing blood viscosity and therefore increasing intraglomerular pressure<sup>33-34</sup>, supporting the  
22 speculation on underlying renoprotective effects of PTX. Pre- and post-hydration with IV saline or  
23 even drinking a few cups of broth can also reduce the blood viscosity. And periprocedural  
24 hydration maybe the most effective preventive measure for patients at risk of CIN. However,  
25 hydration may increase the risk of heart failure, arrhythmia, and short-term mortality in high-risk  
26 patients. Therefore, the reduction in blood viscosity of PTX should not be ignored.

27  
28  
29  
30  
31  
32  
33  
34  
35  
36  
37  
38  
39  
40  
41  
42  
43  
44  
45  
46  
47  
48  
49  
50  
51  
52  
53  
54  
55  
56  
57  
58  
59  
60  
The present study had several limitations. First, most studies used Scr to evaluate the  
renal function, and only 3 trials reported Scr changes before and after contrast media exposure.  
Future studies should use more sensitive markers to assess the renal function, allowing a  
comprehensive evaluation of the renal condition. Second, given the small number of trials  
included in each analysis, we failed to assess the publication bias and small study effects with  
funnel plots. Third, it would have been interesting to know if PTX treatment in subgroups such as  
the elderly and women would also be favorable compared to control. However, we failed to make  
a subgroup analysis because of lacking data. Fourth, some included studies were single-blinded,

1  
2  
3 single-center designs, so the possibility of bias cannot be ruled out. However, all studies used  
4 objective indicators (e.g. Scr) to evaluate CIN. Nevertheless, a prospective multi-centre, double-  
5 blind, placebo-controlled study would make the conclusions more convincing.  
6  
7

8  
9 Current evidence barely strong enough to support the renoprotection of pentoxifylline to  
10 contrast-induced nephropathy. If we assume that the CIN incidence in PTX treated group is 8%,  
11 and 11% in control group, with a noninferiority limit of 1.5% with power of at least 80% and 1-side  
12 type 1 error rate of 2.5%. More than 1000 participants are needed. More trials with larger sample  
13 sizes are needed to evaluate the role of pentoxifylline in contrast-induced nephropathy  
14 prevention.  
15  
16  
17  
18  
19

## 20 21 **Conclusion**

22  
23 Perioperative administration of pentoxifylline to patients undergoing angioplasty did not  
24 significantly reduce the development of contrast-induced nephropathy, but showed some weak  
25 tendency of a lower serum creatinine increase. Based on the available trials, the evidence does  
26 not support the administration of pentoxifylline for the prevention of contrast-induced  
27 nephropathy. More trials with larger sample sizes are needed to evaluate the role of pentoxifylline  
28 in contrast-induced nephropathy prevention.  
29  
30  
31  
32  
33  
34  
35  
36

## 37 **Acknowledgments**

38  
39  
40 None  
41

## 42 **Disclosure**

43  
44  
45 The author reports no conflicts of interest in this work.  
46  
47  
48

## 49 **Data availability**

50  
51  
52 All data relevant to the study are included in the article or uploaded as supplementary information  
53  
54  
55  
56  
57  
58  
59  
60

## Funding

This study was supported by the National Natural Science Foundation of China

(2017YFC1308102)

## Patient and public involvement

Since this is a meta-analysis, no patient and public involved in the design and the implementation of this study.

## Author's Contributions

(I) Conception and design: D.L (II) Administrative support: Y.Y and W.Z (III) Provision of study materials or patients: L.W and D.L (IV) Collection and assembly of data: L.W and D.L (V) Data analysis and interpretation: L.W and D.L (VI) Manuscript writing: All authors (VII) Final approval of manuscript: All authors

**Word count:** 3905

## References

1. Azzalini L, Spagnoli V, Ly HQ. Contrast-Induced Nephropathy: From Pathophysiology to Preventive Strategies. *Can J Cardiol.* 2016;32(2):247-255.
2. Solomon R. Contrast media: are there differences in nephrotoxicity among contrast media? *Biomed Res Int.* 2014;2014:934947.
3. Nash K, Hafeez A, Hou S. Hospital-acquired renal insufficiency. *Am J Kidney Dis.* 2002;39(5):930-936.
4. Abe M, Morimoto T, Akao M, et al. Relation of contrast-induced nephropathy to long-term mortality after percutaneous coronary intervention. *Am J Cardiol.* 2014;114(3):362-368.
5. Wi J, Ko YG, Kim JS, et al. Impact of contrast-induced acute kidney injury with transient or persistent renal dysfunction on long-term outcomes of patients with acute myocardial infarction undergoing percutaneous coronary intervention. *Heart.* 2011;97(21):1753-1757.
6. Yang SK, Duan SB, Pan P, Xu XQ, Liu N, Xu J. Preventive effect of pentoxifylline on contrast-induced acute kidney injury in hypercholesterolemic rats. *Exp Ther Med.* 2015;9(2):384-388.
7. Groesdonk HV, Bauer A, Kreft B, Heringlake M, Paarmann H, Pagel H. Urodilatin and pentoxifylline prevent the early onset of Escherichia coli-induced acute renal failure in a model of isolated perfused rat kidney. *Kidney Blood Press Res.* 2009;32(2):81-90.
8. Perkins RM, Aboudara MC, Uy AL, Olson SW, Cushner HM, Yuan CM. Effect of pentoxifylline on GFR decline in CKD: a pilot, double-blind, randomized, placebo-controlled trial. *Am J Kidney Dis.* 2009;53(4):606-616.
9. Navarro-González JF, Mora-Fernández C, Muros DFM, et al. Effect of pentoxifylline on renal function and urinary albumin excretion in patients with diabetic kidney disease: the PREDIAN trial. *J Am Soc Nephrol.* 2015;26(1):220-229.
10. Chen PM, Lai TS, Chen PY, et al. Renoprotective effect of combining pentoxifylline with angiotensin-converting enzyme inhibitor or angiotensin II receptor blocker in advanced chronic kidney disease. *J Formos Med Assoc.* 2014;113(4):219-226.

- 1  
2  
3 **11.** Firouzi A, Eshraghi A, Shakerian F, et al. Efficacy of pentoxifylline in prevention of  
4 contrast-induced nephropathy in angioplasty patients. *Int Urol Nephrol.* 2012;44(4):1145-1149.  
5  
6 **12.** Shakeryan F, Sanati H, Fathi H, et al. Evaluation of combination therapy with vitamin C  
7 and pentoxifylline on preventing kidney failure secondary to intravenous contrast material in  
8 coronary angioplasty. *Iranian Heart Journal.* 2013;14(3):17-21.  
9  
10 **13.** Yavari V, Ostovan MA, Kojuri J, et al. The preventive effect of pentoxifylline on contrast-  
11 induced nephropathy: A randomized clinical trial. *Int Urol Nephrol.* 2014;46(1):41-46.  
12  
13 **14.** Firouzi A, Shahsavari H, Kiani R, Aeinfar K, Shamloo Y, Mortezaian H. Evaluation of  
14 pentoxifylline in the prevention of contrast-induced nephropathy in patients undergoing primary  
15 percutaneous coronary intervention. *Iranian Heart Journal.* 2015;16(4):28-34.  
16  
17 **15.** Eshraghi A, Naranji-Sani R, Pourzand H, et al. Pentoxifylline and prevention of contrast-  
18 induced nephropathy: Is it efficient in patients with myocardial infarction undergoing coronary  
19 angioplasty? *ARYA Atherosclerosis.* 2016;12(5):1-5.  
20  
21 **16.** Aslanabadi N, Afsar GR, Moharramzadeh S, Entezari-Maleki T. Pentoxifylline for the  
22 prevention of contrast-induced nephropathy in diabetic patients undergoing angioplasty: a  
23 randomized controlled trial. *Int Urol Nephrol.* 2019;51(4):699-705.  
24  
25 **17.** Barzi F, Miri R, Sadeghi R, et al. A randomized double blind placebo controlled trial  
26 examining the effects of pentoxifylline on contrast induced nephropathy reduction after  
27 percutaneous coronary intervention in high risk candidates. *Iran J Pharm Res.* 2019;18(2):1040-  
28 1046.  
29  
30 **18.** Higgins JPT, Savović J, Page MJ, et al. Chapter 8: Assessing risk of bias in a  
31 randomized trial. In: Higgins JPT, Thomas J, Chandler J, Cumpston M, Li T, Page MJ, Welch VA  
32 (editors). *Cochrane Handbook for Systematic Reviews of Interventions* version 6.1 (updated  
33 September 2020). *Cochrane*, 2020. Available from [www.training.cochrane.org/](http://www.training.cochrane.org/handbook) handbook.  
34  
35 **19.** Weisbord SD, Chen H, Stone RA, et al. Associations of increases in serum creatinine  
36 with mortality and length of hospital stay after coronary angiography. *J Am Soc Nephrol.*  
37 2006;17(10):2871-2877.  
38  
39  
40  
41  
42  
43  
44  
45  
46  
47  
48  
49  
50  
51  
52  
53  
54  
55  
56  
57  
58  
59  
60

- 1  
2  
3 **20.** Losito A, Nunzi E, Pittavini L, Zampi I, Zampi E. Cardiovascular morbidity and long term  
4 mortality associated with in hospital small increases of serum creatinine. *J Nephrol.*  
5  
6 2018;31(1):71-77.  
7  
8 **21.** B.J. Barrett, E.J. Carlisle, Metaanalysis of the relative nephrotoxicity of high- and low-  
9 osmolality iodinated contrast media. *Radiology* 188 (1) (1993) 171–178.  
10  
11 **22.** P. Aspelin, P. Aubry, S.G. Fransson, R. Strasser, R. Willenbrock, K.J. Berg, Nephrotoxic  
12 effects in high-risk patients undergoing angiography, *N. Engl. J. Med.* 348 (6) (2003) 491–499  
13  
14 **23.** R. Mehran, G.D. Dangas, S.D. Weisbord, Contrast-associated acute kidney injury, *N. Engl.*  
15 *J. Med.* 380 (22) (2019) 2146–2155  
16  
17 **24.** G. Qian, Z. Fu, J. Guo, F. Cao, Y. Chen, Prevention of contrast-induced nephropathy by  
18 central venous pressure-guided fluid administration in chronic kidney  
19 disease and congestive heart failure patients, *JACC Cardiovasc Interv.* 9 (1) (2016)89–96  
20  
21 **25.** S.S. Brar, V. Aharonian, P. Mansukhani, N. Moore, A.Y. Shen, M. Jorgensen, A. Dua, L.  
22 Short, K. Kane, Haemodynamic-guided fluid administration for the prevention of contrast-induced  
23 acute kidney injury: the POSEIDON randomized controlled trial, *Lancet.* 383 (9931) (2014) 1814–  
24 1823  
25  
26 **26.** M. Leoncini, A. Toso, M. Maioli, F. Tropeano, S. Villani, F. Bellandi, Early highdose  
27 rosuvastatin for contrast-induced nephropathy prevention in acute coronary syndrome: results  
28 from the PRATO-ACS study (protective effect of rosuvastatin and antiplatelet therapy on contrast-  
29 induced acute kidney injury and myocardial damage in patients with acute coronary syndrome), *J.*  
30 *Am. Coll. Cardiol.* 63 (1) (2014) 71–79  
31  
32 **27.** F. Er, A.M. Nia, H. Dopp, M. Hellmich, K.M. Dahlem, E. Caglayan, T. Kubacki, T. Benzing,  
33 E. Erdmann, V. Burst, N. Gassanov, Ischemic preconditioning for prevention of contrast medium-  
34 induced nephropathy: randomized pilot RenPro trial (renal protection trial), *Circulation.* 126 (3)  
35 (2012) 296–303  
36  
37 **28.** Mccullough PA, Stacul F, Davidson C, Becker CR, Tumlin J. Contrast-induced  
38 nephropathy: Clinical insights and practical guidance - A report from the CIN Consensus Working  
39 Panel - Overview. *American Journal of Cardiology* 98(6A, Suppl. S): 2K-4K. 2006;98(6A):2K-4K.  
40  
41  
42  
43  
44  
45  
46  
47  
48  
49  
50  
51  
52  
53  
54  
55  
56  
57  
58  
59  
60



- 1  
2  
3 **29.** Moreau JF, Droz D, Noel LH, Leibowitch J, Jungers P, Michel JR. Tubular nephrotoxicity  
4 of water-soluble iodinated contrast media. *Invest Radiol.* 1980;15(6 Suppl):S54-S60.  
5  
6  
7 **30.** Sendeski M, Patzak A, Pallone TL, Cao C, Persson AE, Persson PB. Iodixanol,  
8 constriction of medullary descending vasa recta, and risk for contrast medium-induced  
9 nephropathy. *Radiology.* 2009;251(3):697-704.  
10  
11  
12 **31.** Seeliger E, Lenhard DC, Persson PB. Contrast media viscosity versus osmolality in  
13 kidney injury: lessons from animal studies. *Biomed Res Int.* 2014;2014:358136.  
14  
15  
16 **32.** De Sanctis MT, Cesarone MR, Belcaro G, et al. Treatment of intermittent claudication  
17 with pentoxifylline: a 12-month, randomized trial--walking distance and microcirculation.  
18  
19 *Angiology.* 2002;53 Suppl 1:S7-S12.  
20  
21  
22 **33.** Lugnier C. Cyclic nucleotide phosphodiesterase (PDE) superfamily: a new target for the  
23 development of specific therapeutic agents. *Pharmacol Ther.* 2006;109(3):366-398.  
24  
25  
26 **34.** Dettelbach HR, Aviado DM. Clinical pharmacology of pentoxifylline with special reference  
27 to its hemorrheologic effect for the treatment of intermittent claudication. *J Clin Pharmacol.*  
28  
29 1985;25(1):8-26.  
30  
31  
32  
33  
34  
35  
36  
37  
38  
39  
40  
41  
42  
43  
44  
45  
46  
47  
48  
49  
50  
51  
52  
53  
54  
55  
56  
57  
58  
59  
60

**Table 1** Baseline characteristics of included studies.

| Study ID        | PTX dosage regimen                                                | Contrast media          | CIN definition                                              | Number |         | Outcomes                  | CIN number |         |
|-----------------|-------------------------------------------------------------------|-------------------------|-------------------------------------------------------------|--------|---------|---------------------------|------------|---------|
|                 |                                                                   |                         |                                                             | PTX    | Control |                           | PTX        | Control |
| Firouzi 2012    | 400mg/Tid from 24h before to 24h after procedure                  | Ultravist/<br>Visipaque | Minimum 0.5mg/dl or 25% increase in Scr 48h after procedure | 140    | 146     | CIN rate                  | 12         | 20      |
| Shakeryan 2013  | 400mg/Tid from 24h before to 24h after procedure                  | Visipaque               | Minimum 0.5mg/dl or 25% increase in Scr 48h after procedure | 164    | 164     | CIN rate                  | 14         | 23      |
| Yavari 2014     | 400mg/Tid from 24h before to 24h after procedure                  | Visipaque               | Minimum 25% increase in Scr 48h after procedure             | 97     | 102     | CIN rate/<br>$\Delta$ Scr | 6          | 6       |
| Firouzi 2015    | 400mg/Tid from the initiation of the study to 24h after procedure | Ultravist/<br>Visipaque | Minimum 0.5mg/dl or 25% increase in Scr 48h after procedure | 148    | 148     | CIN rate                  | 18         | 22      |
| Eshraghi 2016   | 400mg/Tid from the initiation of the study to 24h after procedure | Visipaque               | Minimum 0.5mg/dl or 25% increase in Scr 48h after procedure | 91     | 84      | CIN rate/<br>$\Delta$ Scr | 6          | 8       |
| Aslanabadi 2019 | 1200mg /once 2-4h before procedure                                | Visipaque               | Minimum 0.5mg/dl or 25% increase in Scr 24h after procedure | 45     | 45      | CIN rate/<br>$\Delta$ Scr | 4          | 3       |
| Barzi 2019      | 400mg/Tid from 24h before to 48h after procedure                  | Visipaque 320           | Minimum 0.5mg/dl increase in Scr 24h after procedure        | 55     | 55      | CIN rate/<br>$\Delta$ Scr | 2          | 2       |

**Notes:** Tid, Three Times a Day;  $\Delta$  Scr, serum creatinine change before and after contrast media exposure

**Abbreviations:** CIN, contrast-induced nephropathy; Scr, serum creatinine

1  
2  
3 **Figure legends**  
4

5 **Figure 1** Flow chart of the literature searching process.  
6  
7

8  
9 **Figure. 2** Evaluation of the incidence of contrast-induced nephropathy between the  
10 pentoxifylline group and the control.  
11  
12

13  
14 **Figure. 3** Evaluation of the incidence of contrast-induced nephropathy in the the general  
15 population subgroups between the pentoxifylline group and the control.  
16  
17

18  
19  
20  
21 **Figure. 4** Risk of bias assessment of included studies..  
22  
23  
24  
25  
26  
27  
28  
29  
30  
31  
32  
33  
34  
35  
36  
37  
38  
39  
40  
41  
42  
43  
44  
45  
46  
47  
48  
49  
50  
51  
52  
53  
54  
55  
56  
57  
58  
59  
60

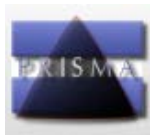

## PRISMA 2009 Flow Diagram

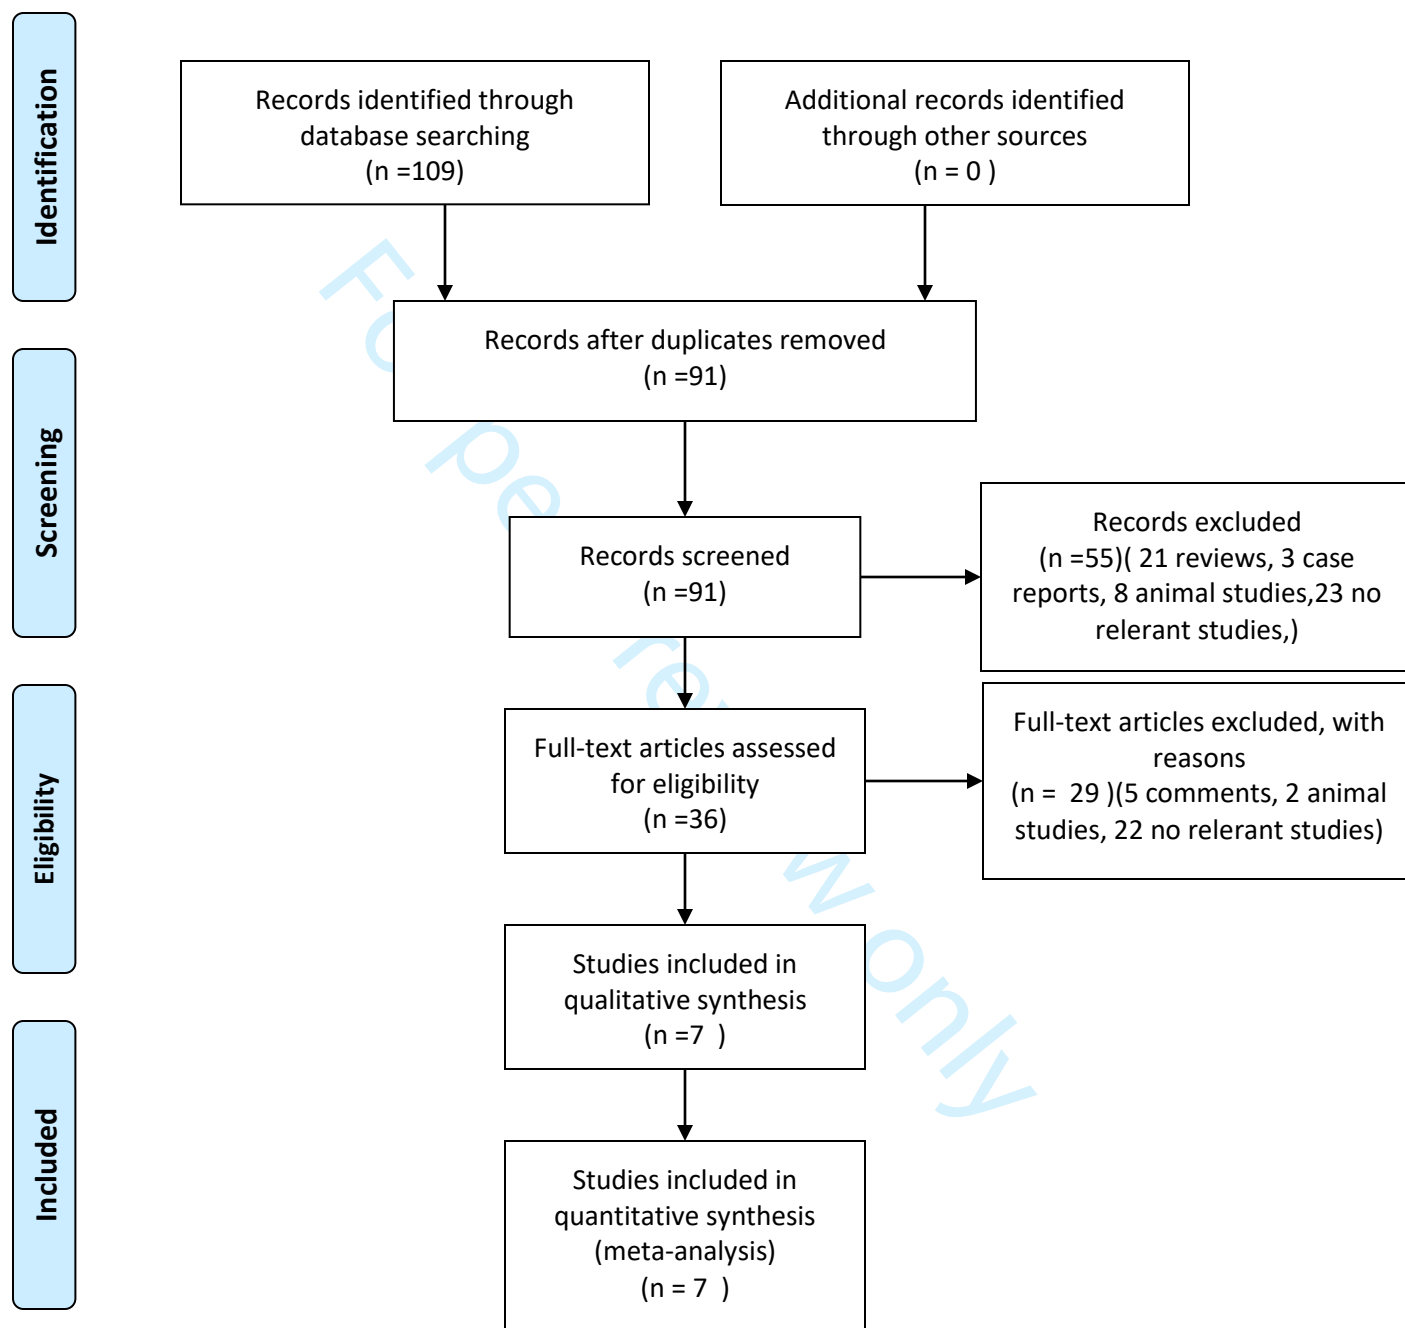

From: Moher D, Liberati A, Tetzlaff J, Altman DG, The PRISMA Group (2009). Preferred Reporting Items for Systematic Reviews and Meta-Analyses: The PRISMA Statement. PLoS Med 6(7): e1000097. doi:10.1371/journal.pmed1000097

For more information, visit [www.prisma-statement.org](http://www.prisma-statement.org).

For peer review only - <http://bmjopen.bmj.com/site/about/guidelines.xhtml>

1  
2  
3  
4  
5  
6  
7  
8  
9  
10  
11  
12  
13  
14  
15  
16  
17  
18  
19  
20  
21  
22  
23  
24  
25  
26  
27  
28  
29  
30  
31  
32  
33  
34  
35  
36  
37  
38  
39  
40  
41  
42  
43  
44  
45  
46  
47  
48  
49  
50  
51  
52  
53  
54  
55  
56  
57  
58  
59  
60

For p

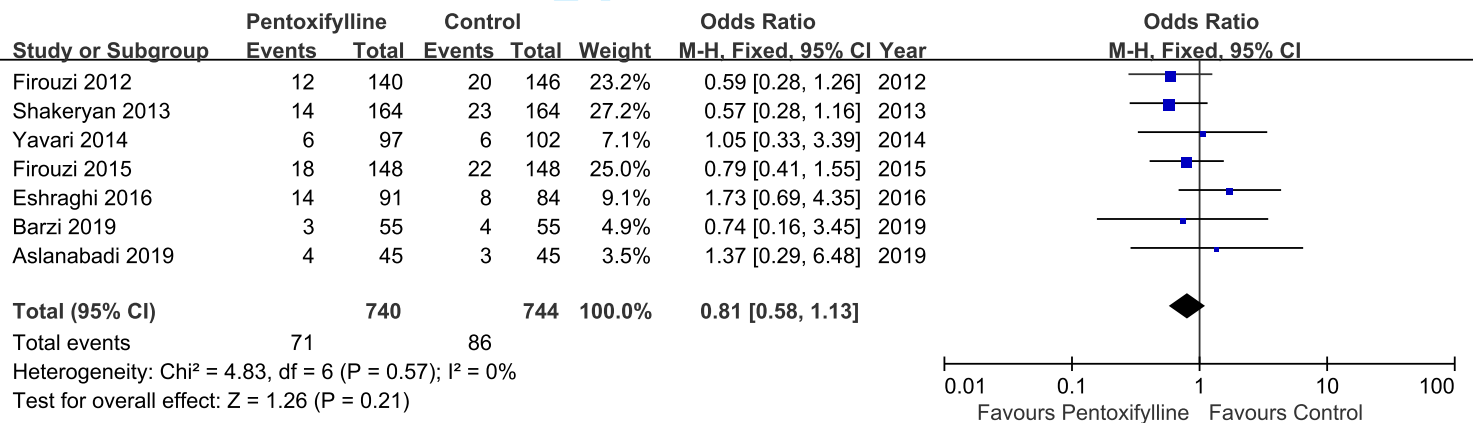

Only

1  
2  
3  
4  
5  
6  
7  
8  
9  
10  
11  
12  
13  
14  
15  
16  
17  
18  
19  
20  
21  
22  
23  
24  
25  
26  
27  
28  
29  
30  
31  
32  
33  
34  
35  
36  
37  
38  
39  
40  
41  
42  
43  
44  
45  
46  
47  
48  
49  
50  
51  
52  
53  
54  
55  
56  
57  
58  
59  
60

For p

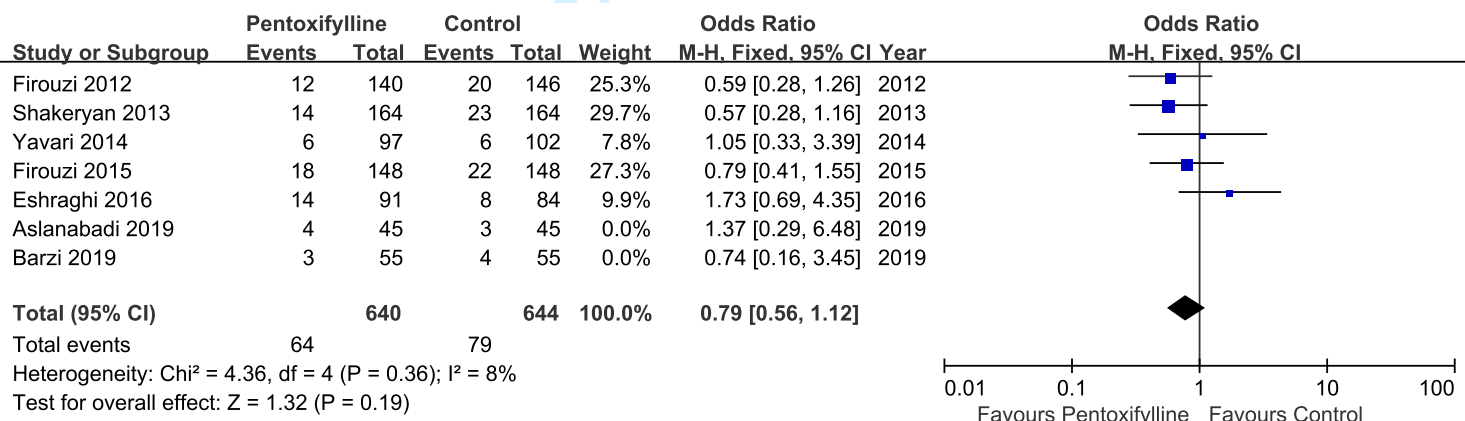

Only

|                 | Random sequence generation (selection bias)                                         | Allocation concealment (selection bias)                                             | Blinding of participants and personnel (performance bias)                           | Blinding of outcome assessment (detection bias)                                      | Incomplete outcome data (attrition bias)                                              | Selective reporting (reporting bias)                                                  | Other bias                                                                            |
|-----------------|-------------------------------------------------------------------------------------|-------------------------------------------------------------------------------------|-------------------------------------------------------------------------------------|--------------------------------------------------------------------------------------|---------------------------------------------------------------------------------------|---------------------------------------------------------------------------------------|---------------------------------------------------------------------------------------|
| Aslanabadi 2019 |  |  |  |  |  |  |  |
| Barzi 2019      |  |  |  |  |  |  |  |
| Eshraghi 2016   |  |  |  |  |  |  |  |
| Firouzi 2012    |  |  |  |  |  |  |  |
| Firouzi 2015    |  |  |  |  |  |  |  |
| Shakeryan 2013  |  |  |  |  |  |  |  |
| Yavari 2014     |  |  |  |  |  |  |  |

## Pubmed

((contrast induced nephropathy[MeSH Terms]) OR (((("contrast media"[MeSH Terms]) OR ("contrast media"[Title/Abstract])) OR ("contrast medium"[Title/Abstract])) OR ("contrast material"[Title/Abstract])) AND (((((((((acute kidney failure[MeSH Terms]) OR (kidney diseases[MeSH Terms])) OR ("kidney diseases")) OR ("nephropathy")) OR ("acute kidney injury")) OR ("kidney disease")) OR ("acute kidney injury")) OR ("acute renal injury")) OR ("renal disease")) OR ("renal diseases")))) AND (((("pentoxifylline"[MeSH Terms]) OR ("pentoxifylline"[Title/Abstract])) OR ("oxpentifylline"[Title/Abstract])) OR ("trental"[Title/Abstract])) OR ("Torental"[Title/Abstract])) OR ("BL - 191"[Title/Abstract]))

## Embase

### Session Results

| No.  | Query Results                                                                                                                                      | Results   | Date        |
|------|----------------------------------------------------------------------------------------------------------------------------------------------------|-----------|-------------|
| #12. | #3 AND #11                                                                                                                                         | 82        | 29 Jun 2020 |
| #11. | #4 OR #10                                                                                                                                          | 20,804    | 29 Jun 2020 |
| #10. | #8 AND #9                                                                                                                                          | 18,782    | 29 Jun 2020 |
| #9.  | #5 OR #6 OR #7                                                                                                                                     | 1,032,150 | 29 Jun 2020 |
| #8.  | 'contrast medium'/exp OR 'contrast agent':ti,ab,kw OR 'contrast media':ti,ab,kw OR 'contrast material':ti,ab,kw OR 'contrast medium':ti,ab,kw      | 195,954   | 29 Jun 2020 |
| #7.  | 'kidney disease':ti,ab,kw OR 'nephropathy':ti,ab,kw OR 'acute kidney injury':ti,ab,kw OR 'renal disease':ti,ab,kw OR 'acute renal injury':ti,ab,kw | 269,746   | 29 Jun 2020 |
| #6.  | 'acute kidney failure'/exp                                                                                                                         | 88,480    | 29 Jun 2020 |
| #5.  | 'kidney disease'/exp                                                                                                                               | 1,004,086 | 29 Jun 2020 |
| #4.  | 'contrast induced nephropathy'/exp                                                                                                                 | 4,953     | 29 Jun 2020 |
| #3.  | #1 OR #2                                                                                                                                           | 14,012    | 29 Jun 2020 |
| #2.  | 'pentoxifylline':ti,ab,kw OR 'oxpentifylline':ti,ab,kw OR 'trental':ti,ab,kw OR 'torental':ti,ab,kw OR 'bl - 191':ti,ab,kw                         | 5,902     | 29 Jun 2020 |
| #1.  | 'pentoxifylline'/exp                                                                                                                               | 13,629    | 29 Jun 2020 |

## Central

#1 MeSH descriptor: [Kidney Diseases] explode all trees 15824  
 #2 ("kidney disease"):ti,ab,kw OR ("nephropathy"):ti,ab,kw OR ("acute kidney injury"):ti,ab,kw OR ("renal disease"):ti,ab,kw OR ("acute renal injury"):ti,ab,kw (Word variations have been searched)24798



1  
2  
3 #3 MeSH descriptor: [Contrast Media] explode all trees 2673  
4 #4 ("contrast agent"):ti,ab,kw OR ("contrast media"):ti,ab,kw OR ("contrast material"):ti,ab,kw  
5 OR ("contrast-medium"):ti,ab,kw (Word variations have been searched) 5166  
6  
7 #5 #1 OR #2 31673  
8  
9 #6 #3 or #4 5166  
10  
11 #7 #5 AND #6 992  
12 #8 MeSH descriptor: [Pentoxifylline] explode all trees 574  
13 #9 ("pentoxifylline"):ti,ab,kw OR ("oxpentifylline"):ti,ab,kw OR ("trental"):ti,ab,kw OR  
14 ("Torental"):ti,ab,kw OR ("PTF"):ti,ab,kw (Word variations have been searched) 1380  
15 #10 ("PTXF"):ti,ab,kw OR ("agapurin"):ti,ab,kw OR ("BL - 191"):ti,ab,kw (Word variations have  
16 been searched) 10  
17 #11 #8 OR #9 OR #10 1381  
18  
19 #12 #7 AND #11 14  
20  
21  
22  
23  
24  
25  
26  
27  
28  
29  
30  
31  
32  
33  
34  
35  
36  
37  
38  
39  
40  
41  
42  
43  
44  
45  
46  
47  
48  
49  
50  
51  
52  
53  
54  
55  
56  
57  
58  
59  
60

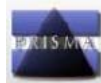

# PRISMA 2009 Checklist

| Section/topic                      | #  | Checklist item                                                                                                                                                                                                                                                                                              | Reported on page # |
|------------------------------------|----|-------------------------------------------------------------------------------------------------------------------------------------------------------------------------------------------------------------------------------------------------------------------------------------------------------------|--------------------|
| <b>TITLE</b>                       |    |                                                                                                                                                                                                                                                                                                             |                    |
| Title                              | 1  | Identify the report as a systematic review, meta-analysis, or both.                                                                                                                                                                                                                                         | 1                  |
| <b>ABSTRACT</b>                    |    |                                                                                                                                                                                                                                                                                                             |                    |
| Structured summary                 | 2  | Provide a structured summary including, as applicable: background; objectives; data sources; study eligibility criteria, participants, and interventions; study appraisal and synthesis methods; results; limitations; conclusions and implications of key findings; systematic review registration number. | 2                  |
| <b>INTRODUCTION</b>                |    |                                                                                                                                                                                                                                                                                                             |                    |
| Rationale                          | 3  | Describe the rationale for the review in the context of what is already known.                                                                                                                                                                                                                              | 3                  |
| Objectives                         | 4  | Provide an explicit statement of questions being addressed with reference to participants, interventions, comparisons, outcomes, and study design (PICOS).                                                                                                                                                  | 3                  |
| <b>METHODS</b>                     |    |                                                                                                                                                                                                                                                                                                             |                    |
| Protocol and registration          | 5  | Indicate if a review protocol exists, if and where it can be accessed (e.g., Web address), and, if available, provide registration information including registration number.                                                                                                                               | N                  |
| Eligibility criteria               | 6  | Specify study characteristics (e.g., PICOS, length of follow-up) and report characteristics (e.g., years considered, language, publication status) used as criteria for eligibility, giving rationale.                                                                                                      | 4                  |
| Information sources                | 7  | Describe all information sources (e.g., databases with dates of coverage, contact with study authors to identify additional studies) in the search and date last searched.                                                                                                                                  | 4                  |
| Search                             | 8  | Present full electronic search strategy for at least one database, including any limits used, such that it could be repeated.                                                                                                                                                                               | 4                  |
| Study selection                    | 9  | State the process for selecting studies (i.e., screening, eligibility, included in systematic review, and, if applicable, included in the meta-analysis).                                                                                                                                                   | 4                  |
| Data collection process            | 10 | Describe method of data extraction from reports (e.g., piloted forms, independently, in duplicate) and any processes for obtaining and confirming data from investigators.                                                                                                                                  | 4                  |
| Data items                         | 11 | List and define all variables for which data were sought (e.g., PICOS, funding sources) and any assumptions and simplifications made.                                                                                                                                                                       | 4                  |
| Risk of bias in individual studies | 12 | Describe methods used for assessing risk of bias of individual studies (including specification of whether this was done at the study or outcome level), and how this information is to be used in any data synthesis.                                                                                      | 4-5                |
| Summary measures                   | 13 | State the principal summary measures (e.g., risk ratio, difference in means).                                                                                                                                                                                                                               | 5                  |
| Synthesis of results               | 14 | Describe the methods of handling data and combining results of studies, if done, including measures of consistency (e.g., I <sup>2</sup> ) for each meta-analysis.                                                                                                                                          | 5                  |

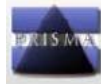

# PRISMA 2009 Checklist

Page 1 of 2

| Section/topic                 | #  | Checklist item                                                                                                                                                                                           | Reported on page # |
|-------------------------------|----|----------------------------------------------------------------------------------------------------------------------------------------------------------------------------------------------------------|--------------------|
| Risk of bias across studies   | 15 | Specify any assessment of risk of bias that may affect the cumulative evidence (e.g., publication bias, selective reporting within studies).                                                             | 4-5                |
| Additional analyses           | 16 | Describe methods of additional analyses (e.g., sensitivity or subgroup analyses, meta-regression), if done, indicating which were pre-specified.                                                         | 4-5                |
| <b>RESULTS</b>                |    |                                                                                                                                                                                                          |                    |
| Study selection               | 17 | Give numbers of studies screened, assessed for eligibility, and included in the review, with reasons for exclusions at each stage, ideally with a flow diagram.                                          | 5                  |
| Study characteristics         | 18 | For each study, present characteristics for which data were extracted (e.g., study size, PICOS, follow-up period) and provide the citations.                                                             | 5                  |
| Risk of bias within studies   | 19 | Present data on risk of bias of each study and, if available, any outcome level assessment (see item 12).                                                                                                | 6                  |
| Results of individual studies | 20 | For all outcomes considered (benefits or harms), present, for each study: (a) simple summary data for each intervention group (b) effect estimates and confidence intervals, ideally with a forest plot. | 5-7                |
| Synthesis of results          | 21 | Present results of each meta-analysis done, including confidence intervals and measures of consistency.                                                                                                  | 5-6                |
| Risk of bias across studies   | 22 | Present results of any assessment of risk of bias across studies (see Item 15).                                                                                                                          | 6                  |
| Additional analysis           | 23 | Give results of additional analyses, if done (e.g., sensitivity or subgroup analyses, meta-regression [see Item 16]).                                                                                    | 6                  |
| <b>DISCUSSION</b>             |    |                                                                                                                                                                                                          |                    |
| Summary of evidence           | 24 | Summarize the main findings including the strength of evidence for each main outcome; consider their relevance to key groups (e.g., healthcare providers, users, and policy makers).                     | 7                  |
| Limitations                   | 25 | Discuss limitations at study and outcome level (e.g., risk of bias), and at review-level (e.g., incomplete retrieval of identified research, reporting bias).                                            | 8-9                |
| Conclusions                   | 26 | Provide a general interpretation of the results in the context of other evidence, and implications for future research.                                                                                  | 9                  |
| <b>FUNDING</b>                |    |                                                                                                                                                                                                          |                    |
| Funding                       | 27 | Describe sources of funding for the systematic review and other support (e.g., supply of data); role of funders for the systematic review.                                                               | 10                 |

From: Moher D, Liberati A, Tetzlaff J, Altman DG, The PRISMA Group (2009). Preferred Reporting Items for Systematic Reviews and Meta-Analyses: The PRISMA Statement. PLoS Med 6(7): e1000097. doi:10.1371/journal.pmed1000097

For more information, visit: [www.prisma-statement.org](http://www.prisma-statement.org).

Page 2 of 2  
For peer review only - <http://bmjopen.bmj.com/site/about/guidelines.xhtml>
